# 1 **Re-direction of phagosomes to the recycling expulsion pathway by** 2 **a fungal pathogen**

3 Lei-Jie Jia<sup>1</sup>, Muhammad Rafiq<sup>1,2</sup>, Lukáš Radosa<sup>1</sup>, Peter Hortschansky<sup>1</sup>, Cristina  
4 Cunha<sup>3,4</sup>, Zoltán Cseresnyés<sup>5</sup>, Thomas Krüger<sup>1</sup>, Franziska Schmidt<sup>1</sup>, Thorsten  
5 Heinekamp<sup>1</sup>, Maria Straßburger<sup>6</sup>, Bettina Löffler<sup>7</sup>, Torsten Doenst<sup>8</sup>, João F.  
6 Lacerda<sup>9,10</sup>, António Campos Jr.<sup>11</sup>, Marc Thilo Figge<sup>2,5</sup>, Agostinho Carvalho<sup>3,4</sup>, Olaf  
7 Kniemeyer<sup>1</sup>, Axel A. Brakhage<sup>1,2,12, \*</sup>

## 8 **Affiliations:**

9 <sup>1</sup>Department of Molecular and Applied Microbiology, Leibniz Institute for Natural  
10 Product Research and Infection Biology – Hans Knöll Institute (HKI), 07745 Jena,  
11 Germany

12 <sup>2</sup>Department of Microbiology and Molecular Biology, Institute of Microbiology,  
13 Friedrich Schiller University, 07745 Jena, Germany

14 <sup>3</sup>Life and Health Sciences Research Institute, School of Medicine, University of Minho,  
15 Campus de Gualtar, 4710-057 Braga, Portugal

16 <sup>4</sup>ICVS/3B's - PT Government Associate Laboratory, Braga/Guimarães, Portugal

17 <sup>5</sup>Research Group Applied Systems Biology, Leibniz Institute for Natural Product  
18 Research and Infection Biology (HKI), Jena, Germany

19 <sup>6</sup>Transfer Group Anti-infectives, Leibniz Institute for Natural Product Research and  
20 Infection Biology (HKI), 07745 Jena, Germany

21 <sup>7</sup>Institute of Medical Microbiology, Jena University Hospital, 07747 Jena, Germany

22 <sup>8</sup>Klinik für Herz- und Thoraxchirurgie, Jena University Hospital, 07747 Jena, Germany

23 <sup>9</sup>Serviço de Hematologia e Transplantação de Medula, Hospital de Santa Maria,  
24 Lisboa, Portugal

25 <sup>10</sup>Instituto de Medicina Molecular, Faculdade de Medicina da Universidade de Lisboa,  
26 Lisboa, Portugal

27 <sup>11</sup>Serviço de Transplantação de Medula Óssea, Instituto Português de Oncologia do  
28 Porto, Porto, Portugal

29 <sup>12</sup>Lead Contact

30 \*Correspondence: [axel.brakhage@leibniz-hki.de](mailto:axel.brakhage@leibniz-hki.de) (A.A.B)

### 31 **Summary**

32 The analysis of host-pathogen interactions bears the potential to discover novel  
33 pathogenicity mechanisms and to obtain novel insights into basic mechanisms of cell  
34 biology. Here, we obtained unprecedented insight into both. We discovered that the  
35 HscA protein on the conidial surface of the clinically important human-pathogenic  
36 fungus *Aspergillus fumigatus* acts as an effector protein. It inhibits phagosome  
37 maturation and reprograms phagosomes for expulsion of conidia. HscA anchors the  
38 human p11 protein to phagosomes. p11 is a decisive factor for targeting phagosomes  
39 either to the degradative or secretory pathway. The relevance of our findings is  
40 indicated by the identification of an SNP in the non-coding region of the human p11  
41 gene that affects its translation and is associated with heightened susceptibility to  
42 invasive pulmonary aspergillosis.

### 43 **Keywords**

44 Pathogen, heat shock protein, human p11, Annexin A2, Rab7, Rab11, phagosome  
45 maturation, recycling endosome, exocytosis, invasive aspergillosis.

### 46 **Introduction**

47 A basic question of cell biology is the molecular understanding of the sorting of  
48 internalized cargoes, which includes the decision whether endosomes and their cargo  
49 enter the degradative or non-degradative, recycling pathways (Cullen and Steinberg,  
50 2018; Pauwels et al., 2017). In the non-degradative pathways, cargos are either  
51 redirected to the cell surface, secreted to the environment, maintained in intracellular  
52 vesicles, or even transferred to other cells (Brakhage et al., 2021; Cullen and  
53 Steinberg, 2018; Kinchen and Ravichandran, 2008; Serra and Sundaram, 2021).  
54 Erroneous decisions in endosomal sorting are associated with various diseases,

55 including neurological and immunological disorders, as well as cancer (Yarwood et al.,  
56 2020). The investigation of pathogens that interfere with phagosome maturation in  
57 cells is important to understand pathogenicity but also helps to identify host proteins  
58 controlling the fate of endosomes (Ledvina et al., 2018; Schmidt et al., 2020; Walpole  
59 et al., 2020; Xie et al., 2021). Until now, there is only limited knowledge about such  
60 proteins that are decisive for endosomes to enter the degradative or secretory  
61 pathways (van Niel et al., 2018; Wei et al., 2020).

62 Here, by analyzing the intracellular processing of spores of the medically  
63 important pathogenic fungus *Aspergillus fumigatus* we identified a novel effector  
64 molecule and a regulatory node controlling the fate of endosomes. *A. fumigatus* is an  
65 opportunistic human pathogen, which causes disseminated infections in  
66 immunocompromised patients (Brakhage, 2005; Dagenais and Keller, 2009; Kousha  
67 et al., 2011; Latgé and Chamilos, 2019; Taccone et al., 2015). The fungus produces  
68 conidia, asexually produced spores, that are released into the air and are continuously  
69 inhaled. Because of their small size of 2–3  $\mu\text{m}$ , conidia can easily reach the lung alveoli  
70 (Brakhage and Langfelder, 2002). Without an effective immune response, inhaled  
71 conidia germinate and grow out in the alveoli which can lead to the onset of a life-  
72 threatening invasive infection.

73 In the lung, *A. fumigatus* can invade pulmonary epithelial cells by a process  
74 designated as induced phagocytosis (DeHart et al., 1997; Liu et al., 2016; WasylInka  
75 and Moore, 2003). Conidia can survive in the phagosomes of immune cells but also  
76 epithelial cells for some time (Amin et al., 2014; Jahn et al., 2002; Schmidt et al., 2020;  
77 Seidel et al., 2020; Thywißen et al., 2011). Similar strategies to evade the host's  
78 immune system, (e.g. the manipulation of the formation of a functional phagosome),  
79 have been described for several bacterial and fungal pathogens (Erwig and Gow, 2016;  
80 Flannagan et al., 2012; Schmidt et al., 2020). In many microbial pathogens, this  
81 process is linked to the secretion of effector proteins that interfere with the host's  
82 membrane trafficking system (Ledvina et al., 2018; Walpole et al., 2020). For *A.*

83 *fumigatus*, we previously established that the conidial pigment dihydroxynaphthalene  
84 (DHN) melanin prevents the formation of functional phagolysosomes containing  
85 conidia (Jahn et al., 2002; Thywißen et al., 2011). Mechanistically, DHN-melanin was  
86 found to sequester  $\text{Ca}^{2+}$  and thus prevents LC3-associated phagocytosis *via*  
87 interference with calcium/calmodulin dependent signaling pathways (Kyrmizi et al.,  
88 2018). In addition, DHN-melanin reduces the formation of lipid-raft microdomains in  
89 the phagolysosomal membrane, which are essential for the generation of a fully  
90 functional phagolysosome (Schmidt et al., 2020). Even though the importance of DHN-  
91 melanin for this process was established, we were puzzled by the observation that  
92 some non-melanized mutant conidia ( $\Delta pksP$ ) still escaped killing by phagocytes  
93 (Akoumianaki et al., 2016; Schmidt et al., 2020), indicating that additional mechanisms  
94 might be involved in the immune escape of this pathogen.

95 By investigating this phenomenon, we discovered an unprecedented strategy  
96 by a fungal pathogen to evade the host immune system by re-directing phagosomes  
97 containing conidia to exocytosis. This is based on the specific interaction of the fungal  
98 surface protein HscA with the human p11 protein (also called S100A10 or the light  
99 chain of annexin A2). As shown here, p11 is a decisive regulatory node for directing  
100 endosomes to different pathways.

## 101 **Results**

### 102 **Surface-exposed HscA protein of *A. fumigatus* binds to host epithelial cells.**

103 Surface proteins of microbial pathogens play an important role in the host-pathogen  
104 interaction, since they are accessible to cellular host proteins. A strategy to identify  
105 microbial surface proteins binding to host cells is their specific labeling by biotinylation  
106 (Jia et al., 2020) coupled with affinity purification (Liu et al., 2016). To identify such  
107 proteins of *A. fumigatus* binding to epithelial cells, we incubated A549 cells with protein  
108 extracts containing biotinylated proteins of the fungal surface (Figure 1A). As observed

109 by immunofluorescence imaging of biotin using Alexa Fluor™ 488 streptavidin, we  
110 observed that in particular the use of protein extracts of germlings (Gm) led to labeling  
111 of the surface of A549 epithelial cells (Figure 1B). This finding suggests that fungal  
112 protein(s) binding to A549 cells is (are) relatively abundant on the surface of germlings  
113 but not dormant conidia (Dc) or mycelia (Mc). To find out which protein has bound to  
114 host cells, we isolated protein extracts of A549 cells after their incubation with *A.*  
115 *fumigatus* protein extracts and performed western blot analysis by using an anti-biotin  
116 antibody. This way, we identified a candidate protein with an apparent molecular mass  
117 of 70 kDa after co-incubation of A549 cells with protein extract of germlings and a  
118 weaker signal for this protein with swollen conidia (Sc) (Figures 1C and 1D). In our  
119 previous proteome analysis of surface proteins of *A. fumigatus* during germination (Jia  
120 et al., 2020), six proteins with molecular masses between 65 and 75 kDa were  
121 detected in extracts of germinating conidia, including four 70 kDa heat-shock proteins.  
122 Multiple peptides covering these heat-shock proteins HscA  
123 (Afu8g03930/AFUB\_083640), Hsp70 (Afu1g07440/AFUB\_007770), Ssc70  
124 (Afu2g09960/AFUB\_025800), and TktA (Afu1g13500/AFUB\_012990) were detected,  
125 but only HscA was predominantly identified in samples of germlings (Jia et al., 2020).  
126 In agreement, in contrast for example to the *hsp70* gene, the mRNA steady-state level  
127 of the *hscA* gene was upregulated in swollen conidia (Figure 1E). The protein level of  
128 HscA was also increased in swollen conidia and germlings (Figure 1F). To verify the  
129 conidial surface localization of HscA, we generated an *hscA-myc* strain of *A. fumigatus*  
130 expressing a Myc-tagged HscA (Figure S1A, S1C, and S1D). As expected, HscA-Myc  
131 could be clearly monitored on the surface of germlings by an anti-Myc antibody (Figure  
132 1G). These results suggested that the 67 kDa heat-shock protein HscA from *A.*  
133 *fumigatus* represents a host cell-binding protein.

134 To provide further proof for this conclusion, we produced recombinant HscA  
135 (rHscA) and as a control Hsp70 (rHsp70) in *Escherichia coli*. Both recombinant  
136 proteins were fused to a Twin-Strep-tag at their N-terminus. By incubation of the

137 purified recombinant proteins with A549 cells, only rHscA, but not rHsp70, bound to  
138 A549 cells (Figures 1H and 1I). To further substantiate our finding of binding of rHscA  
139 to cells, we generated an *hscA-gfp* strain of *A. fumigatus* (Figures S1A, S1B, and S1F–  
140 H). Then, we incubated A549 cells with protein extracts of this *hscA-gfp* strain and, as  
141 a control, with protein extracts of strain *ccpA-gfp* that encodes a GFP fusion with  
142 another previously identified surface protein of conidia (Voltersen et al., 2018). After  
143 immunostaining with an anti-GFP antibody, HscA-GFP was detected on the surface  
144 of A549 cells but not CcpA-GFP (Figures S1I and S1J). Although the Hsp70 protein  
145 was found on the surface of *hscA-gfp* dormant conidia (Figure S1H), binding of Hsp70  
146 to A549 cells was not observed (Figure S1I), which further underlines the specific  
147 binding of HscA but not of Hsp70 to the surface of A549 cells. In addition, we also  
148 detected binding of HscA to several other types of epithelial cells, including human  
149 bronchial epithelial (BEAS-2B) cells, human lung epithelial (H441) cells, human liver  
150 epithelial (HepG2) cells, and mouse type-II lung epithelial (T7) cells (Figure 1J).  
151 Collectively, these results showed that surface exposed heat-shock protein HscA of *A.*  
152 *fumigatus* binds to host epithelial cells.

153 **HscA is an adhesin and intracellular effector protein interfering with the**  
154 **maturation of conidia-containing phagosomes.**

155 To identify a possible role of HscA for the interaction of *A. fumigatus* with the host, we  
156 generated an *hscA* deletion mutant ( $\Delta hscA$ ) (Figures S1A, S1B, and S1D).  $\Delta hscA$   
157 produced slightly smaller colonies on agar plates (Figures S1K and S1L), but showed  
158 no obvious defect in sporulation (Figure S1M) and germination of conidia (Figure S1N),  
159 or an altered susceptibility against various stressors (Figure S1O). The minor growth  
160 defect could be restored by complementation of  $\Delta hscA$  with *hscA-myc* or *hscA* gene  
161 (Figures S1K–O).

162 Based on its host cell binding ability and conidial surface localization, we also  
163 assumed an effector function of HscA intracellularly in epithelial cells. To test this

164 assumption, we incubated wild-type (WT),  $\Delta hscA$  and *hscA-myc* conidia with A549  
165 cells. As measured by an LDH release assay, conidia of the  $\Delta hscA$  strain caused  
166 significantly less damage to host cells than WT conidia, *i.e.*, WT and *hscA-myc* strain,  
167 after 20 h of incubation (Figure 2A). Addition of proteins alone of either rHscA or  
168 rHsp70 did not increase LDH release, whereas preincubation of  $\Delta hscA$  conidia with  
169 the rHscA protein but not with rHsp70 increased LDH release from A549 cells to levels  
170 seen with WT conidia. Thus, addition of rHscA complemented the  $\Delta hscA$  phenotype  
171 (Figure 2A). This finding suggests that HscA is important for cell invasion and cell  
172 damage by conidia. Therefore, we tested the hypothesis whether HscA functions as  
173 adhesin by microscopic imaging. In line with our assumptions, the association of  
174 conidia of the  $\Delta hscA$  strain with A549 epithelial cells was reduced compared to WT  
175 conidia (Figure 2B). This reduction was abolished by the addition of rHscA, but not  
176 rHsp70, to the medium (Figure 2B).

177 As previously shown, *A. fumigatus* conidia are also internalized by alveolar  
178 basal epithelial cells (Amin et al., 2014; Keizer et al., 2020; Seidel et al., 2020;  
179 WasylInka and Moore, 2002), and targeted in these cells to phagolysosomes (Amin et  
180 al., 2014; Seidel et al., 2020; WasylInka and Moore, 2003). Therefore, we determined  
181 internalization and intracellular processing of conidia in these types of cells. After 8  
182 hours of incubation of conidia with A549 cells, a similar proportion between 12–15%  
183 of WT and  $\Delta hscA$  conidia were internalized by A549 cells irrespective of whether  
184 rHscA or rHsp70 protein were added to the  $\Delta hscA$  strain (Figure 2C). Interestingly, as  
185 indicated by LysoTracker staining, compared to WT conidia about two-fold more  
186  $\Delta hscA$  conidia ended up in acidified phagolysosomes (Figures 2D and 2E). Addition  
187 of rHscA, but not rHsp70, reduced the percentage of  $\Delta hscA$  conidia in acidified  
188 phagosomes (Figure 2D). Thus, HscA is also involved in inhibiting phagosomal  
189 maturation. In addition to acidification, another marker for the maturation of  
190 phagosomes is the assembly of the NADPH oxidase complex, consisting of p47phox  
191 and other cytosolic subunits, on the phagosomal membrane (Akoumianaki et al., 2016;

192 Kyrmizi et al., 2018; Schmidt et al., 2020). We found that compared to 25% of WT  
193 conidia, 48% of  $\Delta hscA$  conidia were localized in p47phox-positive (p47phox<sup>+</sup>)  
194 phagosomes (Figures 2F and 2G), which further indicates the importance of HscA for  
195 inhibiting the formation of a mature phagolysosome.

196 To find out by which mechanism HscA modulates phagosome maturation, we  
197 analyzed intracellular processing of conidia by A549 cells using immunofluorescence  
198 microscopy. We started by analyzing phagosomes for the presence of Rab7 (Figure  
199 2H), which plays an essential role in phagosome maturation (Bucci et al., 2000; Rink  
200 et al., 2005; Vieira et al., 2003). While 46% of phagosomes containing WT conidia  
201 were Rab7-positive (Rab7<sup>+</sup>), the proportion increased to 73% when phagosomes  
202 contained  $\Delta hscA$  conidia (Figure 2I). Addition of rHscA, but not rHsp70, to  $\Delta hscA$   
203 conidia reduced the percentage of  $\Delta hscA$  conidia in Rab7<sup>+</sup> phagosomes (Figure 2I)  
204 most likely due to binding of rHscA to the conidial surface of  $\Delta hscA$  conidia that we  
205 had also detected (Figure 2H, b). We also noticed differences in the number of conidia  
206 germinating inside phagosomes. Whereas 48% of internalized WT germlings were  
207 located in Rab7<sup>+</sup> phagosomes of A549 cells, this increased to 75% for germinated  
208  $\Delta hscA$  conidia (Figures 2H and 2J). The addition of rHscA or rHsp70 protein did not  
209 alter this percentage (Figure 2J), likely because coating with both proteins was  
210 restricted to conidia and was also diluted after germination of conidia. Thus, it is  
211 apparently a strategy of the fungus to prevent recruitment of Rab7 to phagosomes  
212 with HscA on the surface of conidia. Collectively, more WT conidia reside in Rab7-  
213 negative phagosomes.

214 To provide firm evidence that the inhibition of phagosome maturation is due to  
215 HscA, we generated latex beads coated with rHscA, rHsp70 or bovine serum albumin  
216 (BSA) as control (Figure 2K). A549 cells were incubated with the different latex beads  
217 and stained for Rab7. A strong signal of Rab7 was detected on phagosomes  
218 containing BSA control beads (Figure 2L), whereas only faint staining of Rab7 on  
219 phagosomes containing rHscA beads was observed (Figure 2L). rHsp70 beads were



220 rarely observed attached to or in phagosomes of A549 cells (Figure 2M). In agreement  
221 with this finding, coating of  $\Delta$ hscA conidia with rHscA protein blocked recruitment of  
222 Rab7 to phagosomes indicated by the lack of staining for Rab7 (Figure 2H). Because  
223 internalization of rHsp70 beads was a rare event, we also compared the association  
224 of coated 1  $\mu$ m and 2  $\mu$ m latex beads with host cells. As expected, rHscA significantly  
225 increased the association of latex beads to A549 cells in comparison to rHsp70- or  
226 BSA-coated beads (Figures 2M). Overall, these data indicate that HscA mediates  
227 adhesion of conidia to host cells and prevents maturation of conidia-containing  
228 phagosomes.

### 229 **HscA targets the human host p11 protein.**

230 To identify a host target protein of HscA, we applied competition binding assays with  
231 a human cell surface marker screening kit (BioLegend) combined with imaging flow  
232 cytometer (ImageStream X) analysis. Although by using this method no HscA binding  
233 receptor was found, we learned that binding of HscA to A549 cells was sensitive to  
234 trypsin degradation (Figure S2A) and to fixation of cells with formaldehyde (Figure  
235 S2B). These results suggested that HscA binds a proteinaceous partner. To identify  
236 such a binding partner of HscA, we applied affinity purification-mass spectrometry. For  
237 this purpose, protein extracts of A549 cells were loaded on an rHscA- or rHsp70-  
238 loaded Strep-Tactin<sup>®</sup> (a streptavidin variant) column. Co-purified proteins were  
239 analyzed using LC-MS/MS (Figure S2C). About 95 to 226 human proteins were  
240 exclusively found in samples co-purified with rHscA or both rHscA and rHsp70 (Figure  
241 3A and Table S1). By comparing the list of proteins, one protein, *i.e.*, p11 (also referred  
242 to as S100A10), was prominently co-purified (Figure 3A). It was detected in all eluates  
243 ( $n = 5$ ) co-purified with rHscA, three times in the eluates co-purified with rHsp70, and  
244 once in the control sample (Figure 3B and Table S1).

245 Protein p11 is known to form a heterotetramer (A2t) with Annexin A2 (AnxA2)  
246 and is thereby protected from degradation (Gerke and Weber, 1984; He et al., 2008).

247 AnxA2 binds phospholipids, regulates actin nucleation, and plays important roles in  
248 organizing membrane microdomains and vesicle trafficking (Morel et al., 2009). In our  
249 affinity purification experiments, however, AnxA2 was detected in all samples  
250 irrespective of the presence of rHscA (Figure 3B), suggesting that AnxA2 is not a  
251 target of HscA, but potentially the p11 protein. The latter conclusion was further  
252 supported by immunofluorescence analysis revealing that HscA-Myc colocalized with  
253 p11 on the surface of A549 cells (Figure 3C).

254 To further substantiate that binding of HscA to host cells is p11-dependent, we  
255 generated a p11-knockout A549 cell line (p11-KO) by transfecting a Cas9-expressing  
256 cell line with guide RNAs targeting the first CDS of p11 (Figure S3A). DNA sequencing  
257 of the generated p11-KO cell line in the region of the gRNA binding region in the p11  
258 gene confirmed frame shifts in both p11 alleles (Figure S3A). The successful  
259 generation of a p11-KO cell line was confirmed by Western blot and  
260 immunofluorescence analysis demonstrating that in p11-KO cells, the p11 protein was  
261 not detectable (Figures S3B and S3C). We then incubated p11-KO cells with the  
262 rHscA protein. As expected, rHscA was not detected on the surface of p11-KO cells  
263 (Figure 3D).

264 To further proof that HscA targets p11 in A549 cells, we incubated A549 cells  
265 with protein extract from *A. fumigatus* WT or a *hscA-gfp* expressing strain. Similar to  
266 the experiments with rHscA (Figure 1I), after incubation, HscA and HscA-GFP were  
267 detected in the A549 lysates by Western blots (Figure 3E). Most importantly, p11,  
268 together with AnxA2 were co-precipitated with HscA-GFP (Figure 3E). Taken together,  
269 these results strongly suggest that p11 and most likely as part of A2t is targeted by  
270 the fungal heat shock protein HscA.

### 271 **p11 participates in adherence and phagocytosis of *A. fumigatus* conidia.**

272 Our data suggest that p11 plays a role in HscA-mediated adhesion and phagocytosis.  
273 To further underline this finding, we incubated A549 cells with conidia and examined

274 their interaction microscopically. Surprisingly, p11 and AnxA2 were not only detected  
275 on the cytoplasmic membrane, as previously reported (Deora et al., 2004; Fang et al.,  
276 2012), but also on both the phagocytic cups (Figures 3F, S3C, S4A) and conidia-  
277 containing phagosomes (Figures 3G and S4A). Although p11 was also present on the  
278 phagocytic cups containing  $\Delta hscA$  conidia, the overall intensity was much lower  
279 compared to the phagocytic cups encasing WT conidia (Figure 3F). Quantification  
280 revealed that 74% of WT conidia and only 53% of  $\Delta hscA$  conidia were associated with  
281 p11-positive (p11<sup>+</sup>) phagocytotic structures (Figure 3H). This reduction was abolished  
282 by addition of rHscA, but not rHsp70, to the medium of A549 cells during their co-  
283 incubation with  $\Delta hscA$  conidia (Figure 3H).

284         Since HscA contributes to the attachment of conidia to host cells (Figure 2B),  
285 our findings of accumulation of p11 in phagocytic cups suggested a role of p11 for this  
286 process and the phagocytosis of conidia. To address this question, we incubated p11-  
287 KO cells with conidia. Consistently, more WT conidia than  $\Delta hscA$  conidia were found  
288 associated with A549-Cas9 cells (Figure 3I). In agreement with our assumption, there  
289 were less WT conidia associated with p11-KO cells than A549-Cas9 cells. When  
290 quantified, we found that the association of WT conidia to p11-KO cells was similar to  
291 that measured for  $\Delta hscA$  conidia to A549-Cas9 cells or p11-KO cells (Figure 3I). In  
292 agreement with the previous result that HscA did not affect the internalization of  
293 conidia in A549 cells (Figure 2C), deletion of p11 did not affect internalization of  
294 conidia either (Figure 3J). These results indicate that HscA-p11 interaction contributes  
295 to the adherence of *A. fumigatus* conidia to host cells.

### 296 **p11 gene expression is induced by *A. fumigatus* infection.**

297 After incubation of A549 cells with conidia for 8 hours, the fluorescence signal  
298 indicative of the presence of p11 in cells having close contact with conidia was  
299 stronger than in cells without conidial contact (Figures 3K and S4B). Furthermore,  
300 compared to uninfected A549 cells, a stronger intensity of p11 immunofluorescence

301 and more p11<sup>+</sup> granules were observed in cells inoculated with *A. fumigatus* conidia  
302 (Figures 3K, S4B, and S4C). The increased presence of p11 upon contact with conidia  
303 was due to increased p11 levels after incubation of A549 cells with WT conidia and  
304  $\Delta hscA$  conidia, as shown by Western blots (Figures 3L and S4D). This finding  
305 indicated that HscA itself is not responsible for the induction of p11 production. The  
306 protein level of AnxA2 did not change during the incubation (Figures 3L and S4D), and  
307 was not affected by the knockout of p11 (Figure S3B) or knockdown of p11 (Figure  
308 S4E). Collectively, our data indicate that the protein level of p11, but not AnxA2,  
309 increases upon contact of cells with *A. fumigatus* conidia. In addition, HscA plays a  
310 role in anchoring p11 to phagocytic cups and phagosomes of the host cell.

### 311 **HscA-induced presence of A2t on phagosomes prevents phagosomal** 312 **maturation**

313 AnxA2 was previously shown to be present on endosomes and to play a role in early-  
314 to-late phagosome transition (Emans et al., 1993; Morel et al., 2009). By contrast,  
315 Morel and Gruenberg did not detect p11 on endosomes and postulated its  
316 dispensability for AnxA2 association to endosomes. In line with the latter, knockdown  
317 of p11 did not affect early-to-late endosomal transition (Morel and Gruenberg, 2007).  
318 Here, we found that although AnxA2 was detected on both p11<sup>+</sup> phagocytic cups and  
319 conidia-containing phagosomes (Figures S4A), p11 was only observed on very few  
320 AnxA2-positive (AnxA2<sup>+</sup>) phagosomes containing WT conidia (Figure 4A). On  
321 phagosomes, indicated by white arrows, both proteins p11 and AnxA2 were present.  
322 Compared to WT conidia, more  $\Delta hscA$  conidia were found in AnxA2<sup>+</sup>/p11<sup>-</sup>  
323 phagosomes as indicated by hollow arrows (Figures 4A and 4B). This is in agreement  
324 with the observation that in p11 knockdown cells, more than 60% of both WT and  
325  $\Delta hscA$  conidia were found in AnxA2<sup>+</sup>/p11<sup>-</sup> phagosomes (Figure 4B). Based on this  
326 data combined with the high percentage of p11<sup>+</sup> phagocytic cups containing conidia  
327 (Figure 3I), we hypothesize that HscA plays a role in stabilizing A2t on phagosomes.

328 To test this hypothesis, we incubated A549 cells with magnetic latex beads coated  
329 with rHscA or rHsp70 and isolated beads-containing phagosomes as previously  
330 described (Goldmann et al., 2021). Immunoblotting confirmed that AnxA2 was eluted  
331 from both rHscA- and rHsp70-coated beads, however, p11 was only eluted from  
332 rHscA-coated beads (Figure 4C). We also applied the chemical inhibitor A2ti-1 (2-[4-  
333 (2-ethylphenyl)-5-o-tolyloxymethyl-4H-[1,2,4]triazol-3-ylsulfanyl]acetamide), that  
334 inhibits binding of AnxA2 to p11 (Reddy et al., 2012; Woodham et al., 2015), to A549  
335 cells before infection with conidia. A549 cells treated with A2ti-1 showed a significantly  
336 reduced percentage of p11<sup>+</sup> phagocytic cups (Figure 4D) and phagosomes (Figure 4E)  
337 irrespective of the presence of HscA on conidia. Overall, these results indicate that  
338 HscA plays a role in stabilizing A2t on phagosomal membranes.

339 The presence of HscA on conidia reduced staining for Rab7 (Figure 2H–2J),  
340 suggesting that interaction of HscA and A2t on phagosomes inhibits phagosome  
341 maturation. To test this hypothesis, we analyzed the presence of both p11 and Rab7  
342 on phagosomes by using immunofluorescence. As expected, there was no Rab7  
343 signal detected on p11<sup>+</sup> phagosomes (Figure 4F). Although a weak p11 signal was  
344 still detectable at the interface between the cytoplasmic membrane and extracellular  
345  $\Delta hscA$  germlings, very few  $\Delta hscA$  conidia were located in p11<sup>+</sup> phagosomes (Figure  
346 4G). Most of the phagocytosed  $\Delta hscA$  conidia located in maturing Rab7<sup>+</sup> phagosomes  
347 that, in addition, were concentrated in the perinuclear region (Figure 4G), where  
348 lysosomes accumulate (Korolchuk et al., 2011). To verify the role of p11 or A2t in  
349 recruiting Rab7 to phagosomes, we incubated conidia with p11-KO cells or treated  
350 A549 cells with the A2t inhibitor A2ti-1. After staining with antibodies against Rab7, in  
351 p11-KO cells most of the WT conidia were located in Rab7<sup>+</sup> phagosomes at the  
352 perinuclear region (Figure 4H). Quantification of phagosomes showed that in p11-KO  
353 cells 75% of the WT and  $\Delta hscA$  conidia were located in Rab7<sup>+</sup> phagosomes (Figure  
354 4I). Consistently, a comparable level of Rab7<sup>+</sup> phagosomes containing WT or  $\Delta hscA$

355 conidia was observed in A549 cells when treated with A2ti-1 (Figure 4I). These results  
356 indicate that A2t prevents phagosomal maturation on phagosomes.

357 **HscA directs phagosomes to the recycling endosomal pathway and triggers**  
358 **expulsion of conidia**

359 In p11-KO cells we also found accumulation of phagosomes and putative lamellar  
360 bodies in the perinuclear region (Figures 4H, 4J, and S3D). This was not the case in  
361 wild-type cells, *i.e.*, A549 or A549-Cas9 cells (Figures S2B and S3D). Since p11 has  
362 been previously shown to play a role in controlling both the distribution of Rab11-  
363 positive (Rab11<sup>+</sup>) recycling endosomes (Zobiack et al., 2003) and exosomes release  
364 (Chen et al., 2017), we analysed the cell cultures for expulsion of conidia. As shown  
365 in Figure S4B, we clearly observed extracellular conidia that could be stained with an  
366 anti-p11 antibody. These observations suggest that *A. fumigatus* manipulates the p11-  
367 Rab11-recycling of endosomes to escape phagolysosomal killing.

368 To investigate whether Rab11, which has been shown before to be  
369 characteristic of recycling compartments and secretory vesicles (Guichard et al., 2014;  
370 Welz et al., 2014), was recruited to p11<sup>+</sup> phagosomes, we stained A549 cells infected  
371 with conidia with an anti-Rab11 antibody. As shown in Figure 4K, Rab11 is indeed  
372 present on p11<sup>+</sup> phagosomes (Figure 4K). Compared to WT conidia, less  $\Delta hscA$   
373 conidia were localized to Rab11<sup>+</sup> phagosomes of A549-Cas9 cells (Figures 4L). Most  
374 importantly, the percentage of Rab11<sup>+</sup> phagosomes was similar for p11-KO cells  
375 infected with WT or  $\Delta hscA$  conidia (Figures 4L), indicating that p11 is essential for  
376 HscA-mediated Rab11 recruitment to phagosomes. To substantiate our findings, we  
377 analyzed another marker of recycling endosomes and exocytosing vesicles, *i.e.*,  
378 Sec15, which is an effector of Rab11 (Zhang et al., 2004). As expected, Sec15 was  
379 clearly detected on p11<sup>+</sup> phagosomes (Figure 4M) and, compared to  $\Delta hscA$  conidia,  
380 more WT conidia were localized to Sec15-positive (Sec15<sup>+</sup>) phagosomes of A549 cells  
381 (Figure 4N). To determine whether this phenotype is directly caused by the presence

382 of HscA, we also incubated A549 cells with rHscA- or rHsp70-coated latex beads. As  
383 shown in Figure S5, rHscA-coated beads were found in p11<sup>+</sup> phagosomes. On the  
384 contrary, rHsp70-coated beads were detected in Rab7<sup>+</sup> phagosomes (Figure S5A).  
385 Rab11 and Sec15 were also detected on p11<sup>+</sup> phagosomes containing rHscA beads,  
386 but not rHsp70 beads (Figures S5B and S5C). In summary, these results indicate that  
387 WT conidia were more frequently retained in non-matured phagosomes, and could  
388 thus be delivered to the recycling endosomal pathway.

389         Since Rab11 is a marker of recycling endosomes and secretory vesicles, and  
390 the cargo within recycling endosomes is targeted to the cell surface, we hypothesized  
391 that such cargo conidia might be expelled and leave the cell. To further test this  
392 hypothesis, we designed an experiment to check whether conidia could be exocytosed  
393 (Figure 5A). Briefly, we incubated A549 host cells with dormant conidia and allowed  
394 their ingestion. Next, we added CFW to the medium that exclusively stains conidia  
395 outside host cells, as previously reported (Schmidt et al., 2020). After removing CFW,  
396 cells were further incubated. Internalized conidia are protected from CFW staining by  
397 host cells and can be detected by fluorescence microscopy (Thywißen et al., 2011).  
398 As proof for our assumption that conidia are exocytosed, we detected CFW-negative  
399 conidia localized to p11<sup>+</sup> and Rab11<sup>+</sup> phagocytic cup structures (Figure 5B),  
400 suggesting these conidia had been redirected within cells to the surface. This  
401 phenotype is dependent on both HscA and p11. About 2.6% of WT conidia and 0.8%  
402 of  $\Delta hscA$  conidia were exocytosed by A549 cells. In line, the percentage for WT  
403 conidia reduced to 1.2% and was unchanged for  $\Delta hscA$  conidia (1 %) when incubated  
404 with p11-KO cells (Figure 5C). This result implies that the interaction of HscA with A2t  
405 contributes to the exocytosis of *A. fumigatus* conidia by host cells.

406         Since the above-mentioned results are deduced from staining of fixed cells, we  
407 applied live-cell imaging. As expected, about 1.3% of WT conidia were exocytosed by  
408 A549 cells (Figures 5D, 5E and Video S1), while we did not observe such an event for  
409  $\Delta hscA$  conidia (Figure 5E). Interestingly, about 1.5% of WT conidia were transferred

410 from a donor cell to a recipient cell (Figures 5F, 5G and Video S2). Again, this was not  
411 observed for  $\Delta hscA$  conidia (Figure 5G). Altogether, these results indicate that  
412 targeting of p11 to the conidial surface protein HscA, prevents host phagosome  
413 maturation. This allows conidia to germinate or to be redirected to the host cell surface.

414 **The donor SNP rs1873311 in the p11 gene (*S100A10*) is associated with a**  
415 **decreased risk of invasive pulmonary aspergillosis (IPA) in stem-cell transplant**  
416 **recipients.**

417 Our data indicate that p11 plays a major role in phagocytosis and phagosomal  
418 processing of conidia. To evaluate this finding in a disease-relevant context, we  
419 screened a cohort of hematopoietic stem cell transplant recipients and their  
420 corresponding donors for haplotype-tagging single nucleotide polymorphisms (SNPs)  
421 in the p11 gene (Figure S6A) and their association with the risk of IPA (Tables S2 and  
422 S3). Among the tag SNPs tested, the rs1873311 SNP (T>C), located in the first intron  
423 of the p11 gene (Figure 6A), was found to be associated with a reduced risk of IPA.  
424 The cumulative incidence of IPA for donor rs1873311 was 25.6 % for T/T and 17.4%  
425 for T/C ( $p = 0.041$ ) genotypes, respectively (Figure 6B and Table S2). The C/C  
426 genotype was rare, occurring in only 3 of all 483 donors, and was therefore not plotted.  
427 In a multivariate model accounting for patient age and sex, and significant clinical  
428 variables (Table S3), the T/C genotype contributed to IPA with an adjusted hazard  
429 ratio of 0.86 (95% confidence interval, 0.78–0.96:  $P = 0.026$ ). We are aware that in  
430 humans, in this particular clinical setting, the mechanism proposed appears to be  
431 mostly relevant in myeloid cells. Therefore, as a proof of concept, we repeated key  
432 experiments in CD45<sup>+</sup> hematopoietic cells isolated from human lung tissues. Similar  
433 to epithelial cells, the isolated hematopoietic cells produce p11<sup>+</sup> phagosomes and  
434 phagocytic cups when confronted with conidia (Figures 6C, 6D, and S7A). There were  
435 more WT conidia (22%) than  $\Delta hscA$  conidia (8%) detected in p11<sup>+</sup> phagosomes  
436 (Figures 6E and S7A). Exactly as found in epithelial cells, less WT conidia (43%) than



437  $\Delta hscA$  conidia (59%) were found in Rab7<sup>+</sup> phagosomes (Figure 6F). We also  
438 incubated the isolated hematopoietic cells with rHscA- or rHsp70-coated latex beads.  
439 As shown in Figure S5D, rHscA-coated beads were found in p11<sup>+</sup> phagosomes, while  
440 rHsp70-coated beads were detected in Rab7<sup>+</sup> phagosomes. These results show that  
441 HscA-induced presence of p11 on phagosomes also prevents phagosomal maturation  
442 in primary hematopoietic cells.

443         Since the rs1873311 SNP is not located in the coding region, we hypothesized  
444 that it might affect the expression of p11. To address this hypothesis, we tested  
445 available human cell lines for the presence of this SNP. DNA sequence analyses at  
446 the rs1873311 locus showed that the human cell line A549 displays a wild-type TT  
447 homozygous genotype, whereas the human H441 cell line is TC heterozygous (Figure  
448 S6B). Thus, Cell line H441 allowed for analyzing the effect of the heterozygous SNP  
449 on p11 expression. As shown above, *A. fumigatus* induced up-regulation of p11 both  
450 at the mRNA level (Figure 6G) and protein level (Figure 3L) in A549 cells. By contrast,  
451 the p11 mRNA was not detectable in H441 cells without or with *A. fumigatus* infection  
452 (Figures 6G and S7B). On the protein level, in the H441 cell line the p11 protein was  
453 still detectable both by Western blotting and immunofluorescence staining, but its level  
454 was not up-regulated by an infection of the cell with conidia (Figures 6H, 6I, and S7C).  
455 Overall, these results indicate that the rs1873311 SNP affects the expression of p11  
456 at the transcriptional level and its inducibility by *A. fumigatus*.

457         This loss of inducibility of the production of p11 protein should be reflected in  
458 distinct phenotypes. Therefore, we examined the p11<sup>+</sup> phagocytic cups induced by  
459 conidia and p11<sup>+</sup> phagosomes in H441 cells because of their heterozygous TC  
460 genotype (Figure S7). As shown in Figures 6J and 6K, in H441 cells similar  
461 percentages of p11<sup>+</sup> phagocytic cups (about 40%, Figure 6J) or p11<sup>+</sup> phagosomes  
462 (less than 3%, Figure 6K) were observed with both WT and  $\Delta hscA$  conidia. However,  
463 when we compared the percentage calculated for A549 with that for H441 cells, in the  
464 heterozygous T/C cell line H441 the calculated percentages were lower than those

465 obtained with the TT homozygous A549 cells (Figures 4D and 4E). When we  
466 considered Rab7<sup>+</sup> phagosomes, slightly less WT conidia (71%) than  $\Delta hscA$  conidia  
467 (85%) were detected in H441 cells (Figures 6L and S7C). Comparison of the cell lines,  
468 i.e., H441 cells and A549 revealed a much higher percentage of Rab7<sup>+</sup> phagosomes  
469 containing WT conidia in H441 cells than in A549 cells (50%) (Figures 2I and 4I).  
470 These findings confirm that a wild-type genotype is required for increased p11 mRNA  
471 and protein levels induced by *A. fumigatus*.

## 472 **Discussion**

473 The decision whether endosomes enter the degradative or recycling pathway is of  
474 fundamental importance for killing of ingested pathogens. Here, we report the  
475 discovery of the surface protein HscA of the human-pathogenic fungus *A. fumigatus*  
476 that acts as a fungal effector protein influencing this decision. Our data suggest that  
477 HscA anchors the human A2t protein complex to phagosomes thereby inhibiting  
478 phagosome maturation and inducing expulsion of conidia from epithelial cells (Figure  
479 7). In addition, our data reveal that *A. fumigatus* infection also induces increased levels  
480 of human p11 and recruitment of A2t to phagocytic cups and phagosomal membranes  
481 independent of the presence of HscA. Anchoring and stabilization of A2t on the  
482 phagosomal membrane by HscA directs phagosomes to the secretory pathway by  
483 excluding Rab7 but recruiting Rab11 and Sec15 to phagosomes. As a consequence,  
484 conidia escape phagolysosomal killing by (a) germination inside a Rab7-negative  
485 phagosome, (b) their lateral transfer to other host cells, or (c) by their translocation to  
486 the surface of host cells or to the extracellular space. When HscA is lacking as in  
487  $\Delta hscA$  conidia, p11 dissociates from A2t on the membranes of phagocytic cups and  
488 phagosomes containing the respective conidia. This leads to (d) recruitment of Rab7  
489 to phagosomes and their maturation to functional phagolysosomes (Figure 7). A  
490 strong indication for the clinical relevance of our findings is the identification of an SNP  
491 in the non-coding region of the p11 gene that is associated with heightened

492 susceptibility to IPA in hematopoietic stem-cell transplant recipients when present in  
493 stem-cell donors. As shown by analyzing this SNP in cell lines we provide evidence  
494 that the SNP affects production of the p11 protein.

495 Fungal and bacterial pathogens have developed various strategies to escape  
496 phagolysosomal killing (Pauwels et al., 2017; Westman et al., 2020). Despite the  
497 importance of DHN-melanin on the surface of *A. fumigatus* conidia for delaying  
498 phagosome maturation, albino isolates (Couger et al., 2018) and albino  $\Delta pksP$  mutant  
499 conidia, that do not contain DHN-Melanin, can still survive macrophage engulfment  
500 although with much lower frequency (Kyrnizi et al., 2018). Therefore, it was  
501 reasonable to speculate that effector molecules other than DHN-melanin also interfere  
502 with phagosomal maturation and thus allow for immune evasion. The here discovered  
503 HscA protein represents such an effector protein. HscA was not found in secretome  
504 studies of *A. fumigatus* swollen conidia cultivated in RPMI medium (Blango et al.,  
505 2020), but traces were detectable in the supernatant of cultures grown with collagen  
506 (Shemesh et al., 2017). This finding suggests that the main portion of HscA is bound  
507 to the surface of conidia, while a minority may be shedded from the surface.

508 HscA belongs to the family of HSP70s that are also found on the surface of  
509 bacteria, fungi, and mammalian cells (Candela et al., 2010; Sun et al., 2010). In the  
510 yeast *Saccharomyces cerevisiae*, putative homologs of HscA are designated as Ssb1  
511 and Ssb2 (HscA has 75% amino acid sequence identity with Ssb2). They are important  
512 for folding, co-translational assembly of nascent polypeptides, and also the fidelity of  
513 translation termination (Döring et al., 2017; Gribling-Burrer et al., 2019; Willmund et  
514 al., 2013). Despite their assumed biological importance, deletion mutants of both *ssb1*  
515 and *ssb2* in *S. cerevisiae* (Rakwalska and Rospert, 2004), *hscA* in *Fusarium*  
516 *graminearum* (Liu et al., 2017), *Magnaporthe oryzae* (Yang et al., 2018) and in *A.*  
517 *fumigatus*, as shown here, were viable. Since deletion of *hscA* in *A. fumigatus* only  
518 showed a minor phenotype under the conditions tested, the elucidation of the function  
519 of the protein other than acting as an effector protein, awaits further studies.

520 Since Ssb proteins in yeast were shown to bind a large number of substrates  
521 (Döring et al., 2017; Willmund et al., 2013), it is reasonable to assume that HscA also  
522 binds other host molecules than p11. Among the proteins detected here by affinity  
523 purification (Table S1), two microtubule-related proteins DYNLRB2 (Dynein Light  
524 Chain Roadblock-Type 2) and MAP4 (Microtubule Associated Protein 4) that are  
525 involved in intracellular vesicle trafficking (Pietrantoni et al., 2021; Thapa et al., 2020)  
526 were detected. These proteins might also directly or indirectly interact with HscA  
527 contributing to further manipulation of endosomal trafficking.

528 The expression of p11 in various cell types such as BEAS, HeLa, and breast  
529 cancer cell line MCF7, was previously shown to be induced by various stimuli,  
530 including cytokines, growth factors, dexamethasone or the chemotherapy agent  
531 paclitaxel, both at the transcriptional and protein level (Lu et al., 2020; Svenningsson  
532 and Greengard, 2007). With *A. fumigatus* conidia, we found another inductor that  
533 triggers p11 expression at both transcript and protein level. Because  $\Delta hscA$  conidia  
534 still displayed inducing capacity, the p11 induction is independent of HscA. It thus  
535 remains to be shown which molecules of *A. fumigatus* trigger expression and in  
536 particular translation of p11. For the  $\Delta hscA$  mutant, enrichment of p11 was less  
537 prominent, likely because anchoring of p11 by HscA in the phagocytic cup was lacking.

538 As shown here, exocytosis and lateral transfer of conidia are relatively rare  
539 events, as similarly observed for the fungal pathogen *Cryptococcus neoformans* and  
540 exocytosis for *Candida albicans* (Bain et al., 2012; Ma et al., 2006; Ma et al., 2007).  
541 Previously, Shah et al. (2016) observed programmed necrosis-dependent lateral  
542 transfer of *A. fumigatus*-containing phagosomes from dying human macrophages to  
543 other macrophages. Although  $\beta$ -glucan appears to be a fungal determinant of shuttling,  
544 the data suggested that shuttling was driven by a component derived from the conidial  
545 cell wall (Shah et al., 2016). At this stage, we cannot exclude that the interaction of  
546 HscA with p11 is involved in this process. This, however, seems unlikely because,  
547 here, we observed release and transfer of conidia by living cells. Also in zebra fish and

548 mouse phagocytes, a unidirectional shuttling of conidia initially phagocytosed by  
549 neutrophils to macrophages was observed that involved phagosome transfer  
550 (Pazhakh et al., 2019). This shuttling indeed involved living cells. It remains to be  
551 shown whether the same shuttling also holds true for human cells. What appears to  
552 be comparable is our observation that conidia are also released and transferred by  
553 and to A549 cells when still present in phagosomes, since we detected p11 on the  
554 surfaces of exocytosed conidia and germings.

555       Until now, molecular mechanism(s) underlying such phenomena on both sides  
556 the fungal pathogen and the human host, however, have remained obscured. Here,  
557 we found that exocytosis is triggered by the fungal surface molecule HscA that acts  
558 as an effector of human p11. The low expulsion rate determined raises the question  
559 of the clinical relevance of our findings and a strong indication was the analysis of a  
560 cohort of patients at-risk of IPA, which demonstrated a significant association between  
561 an SNP at the p11 locus (rs1873311) and heightened susceptibility to infection. In our  
562 previous study (Schmidt et al., 2020), the rs3094127 SNP located in the human *FLOT1*  
563 gene is lacking in the corresponding gene in mice. Similarly, in this study, there is very  
564 low sequence similarity at the rs1873311 SNP locus between the human and mouse  
565 p11 gene (Figures S6C–E). Therefore, the SNP cannot be analyzed in mice.  
566 Consequently, it is reasonable to assume that there are differences in function  
567 between mouse and human p11.

568       The association with the donor genome appeared to exclude a relevant role of  
569 the SNP in the non-hematopoietic compartment, including epithelial cells and  
570 endothelial cells although this is a matter of debate. Therefore, we also analyzed  
571 hematopoietic cells isolated from human lung tissues and demonstrated identical p11-  
572 dependent processing of conidia in these immune cells. In line with the importance of  
573 epithelial cell, previously, a comprehensive modelling study revealed the importance  
574 of epithelial cells for the defence against *A. fumigatus* infection (Ewald et al., 2021)

575           The functional relevance of the identified SNP was revealed by comparing the  
576 phenotypes of A549 (homozygous T/T) and H441 (heterozygous T/C) cells after  
577 infection with *A. fumigatus*. The heterozygous SNP had a major effect on the mRNA  
578 steady-state-level of p11, *i.e.*, transcript was not detected in H441 cells. After  
579 stimulation with *A. fumigatus* conidia, the heterozygous (T/C) SNP at the rs1873311  
580 locus did not lead to upregulated levels of p11 mRNA compared to cells carrying the  
581 (T/T) wild-type locus. The identification of this SNP might help to stratify the risk of IPA  
582 and identify patients that would benefit the most from antifungal prophylaxis or  
583 intensified diagnostics.

584           A2t and AnxA2 are targeted by various viral, bacterial, and fungal pathogens at  
585 different stages of infection (Jolly et al., 2014; Li et al., 2015; Stukes et al., 2016; Taylor  
586 et al., 2018b). In the case of the human papillomavirus (HPV), A2t is a central mediator  
587 of intracellular trafficking of HPV from early endosomes to late multivesicular  
588 endosomes and prevents lysosomal degradation of the virus. Inhibition of A2t by small  
589 molecule inhibitor A2ti-1, antibody against p11, or knockout of p11 inhibits HPV  
590 infection in host cells (Dziduszko and Ozburn, 2013; Taylor et al., 2018a; Woodham et  
591 al., 2015). By using the *anxa2*<sup>-/-</sup> mouse model, AnxA2 has been shown to play  
592 important roles against the bacterial pathogen *Pseudomonas aeruginosa* or the fungal  
593 pathogen *C. neoformans* (Luo et al., 2016; Stukes et al., 2016). After infection of  
594 *anxa2*<sup>-/-</sup> macrophages with *C. neoformans*, nonlytic exocytosis decreased, whereas  
595 the frequency of lytic exocytosis went up and consequently *anxa2*<sup>-/-</sup> mice were more  
596 susceptible to *C. neoformans* infection (Stukes et al., 2016). Given that p11 is rapidly  
597 degraded in the absence of AnxA2 (Puisieux et al., 1996; Taylor et al., 2018a), a role  
598 of p11 or A2t in *C. neoformans* nonlytic exocytosis can be assumed. Here, we found  
599 that A2t inhibited not only the maturation of phagosomes containing *A. fumigatus* WT  
600 conidia but also contributed to the association of conidia to the surface of host cells.  
601 Unlike viruses that need to replicate in the nucleus and avoid entering recycling  
602 endosomes (Young et al., 2019), *A. fumigatus* recruits Rab11 to phagosomes in a

603 p11-dependent manner. This prevents phagosomal maturation and, furthermore,  
604 triggers the secretory pathway resulting in re-direction of conidia-containing  
605 phagosomes back to the cell surface. In this way, fungal conidia germinate and grow  
606 in a less hostile environment and can hide from professional phagocytes.

607 In conclusion, fungal surface protein HscA mediates recruitment and anchoring  
608 of A2t to phagosomes. Continuous presence of p11 on the phagosomal membrane  
609 puts maturation on hold and redirects phagosomes to the non-degradative pathway.  
610 The lack of phagosome maturation allows *A. fumigatus* to grow inside phagosomes  
611 and escape cells by outgrowth of germinating conidia and by expulsion and also  
612 transfer of conidia between cells. Our finding may contribute to a better understanding  
613 of pathogenic mechanisms in many human diseases associated with p11 and AnxA2  
614 such as breast cancer stemness (Lu et al., 2020) and neurological disorders (Jin et al.,  
615 2020).

616

## 617 **Acknowledgments**

618 We thank Silke Steinbach, Sylke Fricke, and Flora Riviuccio for excellent technical  
619 assistance. We are grateful to Hendrik Huthoff for critical reading of the manuscript.  
620 This work was funded by the Deutsche Forschungsgemeinschaft (DFG, German  
621 Research Foundation) – the cluster of excellence *Balance of the Microverse* – Project-  
622 ID 390713860, Gepris 2051, the DFG-ANR financed French-German project “Afulnf  
623 (project number 316898429)”, the DFG Collaborative Research Center  
624 (CRC)/Transregio FungiNet 124 ‘Pathogenic fungi and their human host: Networks of  
625 Interaction’ (project A1 and Z2; project number 210879364), the DFG CRC 1278  
626 ‘PolyTarget’ (project Z01; project number 316213987), the Leibniz project (K217/2016),  
627 the Fundação para a Ciência e Tecnologia (FCT) (PTDC/MED-GEN/28778/2017,  
628 PTDC/SAU-SER/29635/2017, UIDB/50026/2020 and UIDP/50026/2020), the  
629 Northern Portugal Regional Operational Programme (NORTE 2020), under the  
630 Portugal 2020 Partnership Agreement, through the European Regional Development

631 Fund (ERDF) (NORTE-01-0145-FEDER-000039), the European Union's Horizon  
632 2020 research and innovation programme under grant agreement no. 847507, the "la  
633 Caixa" Foundation (ID 100010434) and FCT under the agreement  
634 LCF/PR/HR17/52190003, and the Gilead Research Scholars Program – Anti-Fungals.  
635 M.R. and F.S. were members of the excellence graduate school Jena School for  
636 Microbial Communication (JSMC) funded by the DFG. C.C. was supported by FCT  
637 (CEECIND/04058/2018 to C.C.),

### 638 **Author contributions**

639 A.A.B. designed the research project and obtained funding. L.J., O.K., and A.A.B.  
640 designed the approach and experiments, and L.J. conducted the majority of the  
641 experiments and data analyses. M.R. performed live-cell imaging, confocal  
642 microscopy imaging, and qPCR analysis. L.R., M.R., F.S., T.H., and M.S. performed  
643 cell culture experiments. P.H. purified recombinant proteins. Z.C. and M.T.F. analyzed  
644 the live cell imaging data. C.C., A.C., J.F.L., and A.C.Jr collected patient samples and  
645 clinical data, performed the genetic analysis of the patients. T.K. performed LC-  
646 MS/MS analysis. B.L. and T.D. collected human lung tissues. L.J., O.K., and A.A.B.  
647 wrote the manuscript, and all authors edited the manuscript.

### 648 **Declaration of interests**

649 The authors declare no competing interests.

### 650 **Data availability**

651 The mass spectrometry proteomics data have been deposited to the  
652 ProteomeXchange Consortium *via* the PRIDE (Perez-Riverol et al., 2022) partner  
653 repository with the data set identifier PXD030501. All materials within the paper are  
654 available from the corresponding author upon reasonable request.



655 **Figure legends**

656 **Figure 1. Fungal surface protein HscA binds to the surface of host cells.**

657 (A) Scheme illustrating the experimental set-up used for experiments shown in (B–D)  
658 Abbreviations: Dc, dormant conidia; Sc, swollen conidia; Gm, germlings; Mc, mycelia;  
659 IF, Immune fluorescence analysis; WB, Western blot analysis.

660 (B–D) Biotinylated *A. fumigatus* surface protein binds to the surface of host cells.  
661 Surface proteins of Dc, Sc, Gm, and Mc were biotinylated with Ez-Link sulfo-NHS-LC  
662 biotin. Subsequently, protein extracts of these different fungal morphotypes were  
663 incubated with A549 cells.

664 (B) Proteins bound to cells were detected with Alexa Fluor® 488 Streptavidin by  
665 fluorescence microscopy.

666 (C and D) Immunoblot analyses of A549 cells incubated with protein extracts of *A.*  
667 *fumigatus* (C) Sc and (D) Gm by using an anti-biotin antibody. Molecular masses of  
668 standard proteins are indicated in kDa on the left margin of (C). Bio +, addition of  
669 biotinylated surface proteins.

670 (E) *hscA* expression is up-regulated in Sc. Total RNA of WT *A. fumigatus* Dc, Sc, Gm,  
671 and Mc was analyzed using Northern blotting with probes complementary to *hscA* or  
672 *hsp70*. rRNA bands are shown as loading control.

673 (F) The HscA protein level is up-regulated in Sc and Gc. Immunoblot analysis of HscA  
674 and Hsp70 of WT *A. fumigatus* Dc, Sc, Gm, and Mc using a rabbit anti-HscA antibody  
675 and mouse anti-Hsp70 antibody. GAPDH bands are shown as loading control.

676 (G) Detection of HscA on the surface of *A. fumigatus* germlings. Germlings of strain  
677 *hscA-myc* and WT were stained with calcofluor white (CFW) and anti-Myc antibody.  
678 PC, phase contrast. See also Figures S1C and S1D.

679 (H–J) Recombinant HscA (rHscA) binds to host cells. See also Figures S1G–J.

680 (H) Binding of rHscA to A549 cells was detected by immunostaining of cells with anti-  
681 strep antibody. DIC, differential interference contrast.

682 (I) Detection of rHscA from protein extracts of A549 cells. A549 cells were incubated  
683 with recombinant rHscA or rHsp70 for 2 hours at 37°C. Recombinant proteins were  
684 detected with an anti-strep antibody. CBB, Coomassie brilliant blue staining.

685 (J) Human bronchial epithelial cells (BEAS-2B), human lung epithelial cells (H441),  
686 human liver epithelial cells (HepG2), and mouse lung epithelial cells (T7) were  
687 incubated with rHscA or rHsp70 followed by staining with an anti-strep antibody

688 All scale bars, 10  $\mu$ m.

## 689 **Figure 2. HscA functions as an effector protein.**

690 (A) Relative LDH release of A549 cells incubated with conidia of the indicated *A.*  
691 *fumigatus* strain at MOI = 10 for 20 h. Addition of 10  $\mu$ g/mL rHscA or rHsp70 is  
692 indicated. Control cells were incubated with proteins only and without (W/O) *A.*  
693 *fumigatus*. Error bars represent the mean  $\pm$  SD. \* $p$  < 0.05, \*\* $p$  < 0.01 (unpaired, two-  
694 tailed t test).

695 (B) Association and (C) internalization of *A. fumigatus* conidia with/by A549 cells. After  
696 8 h of incubation with conidia, A549 cells were washed and extracellular conidia were  
697 stained with CFW. Conidia associated with host cells and internalized by host cells  
698 were counted. Addition of rHscA and rHsp70 to  $\Delta$ *hscA* conidia is indicated. Grey dots  
699 indicate the calculated values of individual microscopic images of six experiments.  
700 Error bars represent the mean  $\pm$  SD. Colored dots indicate the mean of six individual  
701 experiments.

702 (D–G) HscA prevents phagosome maturation.

703 (D) Percentage of acidified phagosomes containing conidia of the WT and the  $\Delta$ *hscA*  
704 strain determined with LysoTracker Red. The addition of proteins is indicated.

705 Microscopy images of (E) LysoTracker<sup>+</sup> or (F) p47phox<sup>+</sup> phagosomes of A549 cells  
706 containing WT or  $\Delta$ *hscA* conidia. Extracellular conidia were stained with CFW. (G)

707 Percentage of p47phox<sup>+</sup> phagosomes of A549 cells containing *A. fumigatus* conidia.

708 Data are mean  $\pm$  SD. \*\* $p$  < 0.01 (unpaired, two-tailed t test).

709 (H–J) HscA prevents Rab7 recruitment to phagosomes containing *A. fumigatus*  
710 conidia.

711 (H) Immunofluorescence staining of Rab7<sup>+</sup> phagosomes of A549 cells containing *A.*  
712 *fumigatus* WT or  $\Delta hscA$  conidia.  $\Delta hscA$  conidia were incubated with recombinant  
713 HscA (rHscA) or rHsp70 proteins at room temperature for 30 min before inoculation.  
714 A549 cells were stained with a mouse anti-Strep-tag antibody and a rabbit anti-Rab7  
715 antibody. Open and thin arrows indicate conidia in Rab7<sup>+</sup> phagosomes and a Rab7-  
716 negative phagosome containing  $\Delta hscA$  conidia coated with rHscA, respectively.  
717 Regions labeled with a (WT), b ( $\Delta hscA$  + rHscA), and c ( $\Delta hscA$ ) in dashed-line boxes  
718 are magnified on the right. Dashed-line circle marks a Rab7-negative phagosome  
719 containing germinated WT conidia.

720 (I) Percentage of Rab7<sup>+</sup> phagosomes of A549 cells containing *A. fumigatus* conidia.  
721 (J) Percentage of Rab7<sup>+</sup> phagosomes of A549 cells containing *A. fumigatus* germlings.

722 (K–M) rHscA prevents Rab7 recruitment to phagosomes that contain latex beads and  
723 contributes to association of latex beads with host cells.

724 (K) Immunofluorescence staining of green autofluorescent (Auto) latex beads coated  
725 with recombinant proteins rHscA and rHsp70 stained with anti-Strep antibody. Bovine  
726 serum albumin (BSA)-coated beads served as negative control. Scale bars, 1  $\mu$ m.

727 (L) Immunofluorescence staining of A549 cells with phagosomes containing latex  
728 beads coated with rHscA or BSA. The open arrow indicates a phagocytosed latex  
729 bead coated with rHscA; the small, solid arrow marks an extracellular latex bead.

730 (M) Association index of latex beads with a diameter of 1  $\mu$ m or 2  $\mu$ m associated with  
731 A549 cells. A549 cells were incubated with latex beads coated with BSA, rHscA or  
732 rHsp70, for 8 h at MOI = 20.

733 (B, C, D, G, I, J, and M) Data are mean  $\pm$  SD; different letters indicate significant  
734 difference based on multiple comparisons (Turkey method) after ANOVA. Scale bars  
735 represent 10  $\mu$ m in E, F, H, and L.

736 Abbreviations: LDH, lactate dehydrogenase; PSs, phagosomes; W/O, without; WT,  
737 wild type; DIC, differential interference contrast.

738 **Figure 3. HscA anchors the human p11 protein on phagocytic cups and**  
739 **phagosomal membranes.**

740 (A and B) LC-MS/MS detection of p11 co-purified with rHscA.

741 (A) Venn diagram showing the number of proteins (in brackets) detected by LC-  
742 MS/MS in eluates with rHscA or in both samples derived from rHscA and rHsp70.  
743 Replicates 1–5 are illustrated in different colors and the number of overlapping  
744 proteins is marked by numbers. (B) Relative abundance of p11 and AnxA2 co-purified  
745 with recombinant proteins rHscA and rHsp70. Data are mean  $\pm$  SD; \*\* $p < 0.01$ ; ns, not  
746 significant (paired, two-tailed t test). See Figure S2C and Table S1.

747 (C) HscA-Myc colocalizes with p11 on the surface of live A549 cells. A549 cells were  
748 incubated with protein extracts from strain *hscA-myc*. Colocalization of HscA-Myc and  
749 p11 was indirectly detected using a rabbit anti-Myc antibody and a mouse anti-p11  
750 antibody. For the negative control, the mouse anti-p11 antibody was not added.

751 (D) Binding of HscA to A549 cells is p11-dependent. After incubation with rHscA or  
752 rHsp70 for one hour at room temperature, A549-Cas9 or p11-KO cells were stained  
753 with mouse anti-Strep antibody.

754 (E) Western blot analysis of p11 and AnxA2 co-purified with HscA-GFP. After co-  
755 incubation of A549 cells with protein extracts from *A. fumigatus* WT or *hscA-gfp* strain  
756 for 2h at 37°C, cells were washed with PBS and then lysed in IP buffer. GFP-Trap  
757 magnetic beads were used to purify HscA-GFP and its binding proteins. Co-purified  
758 proteins were analyzed with the antibodies indicated at the right margin.

759 (F and G) p11 is recruited to (F) phagocytic cups and (G) phagosomes of A549 cells.  
760 Extracellular conidia were stained with CFW and A549 cells with mouse anti-p11  
761 antibody. Relative signal intensities of the respective emission fluorescence along the

762 lines drawn across the phagocytic cups are depicted on the right of (F). See also  
763 Figure S3C and S4A.

764 (H–J) HscA-p11 interaction contributes to adhesion of *A. fumigatus* conidia to host  
765 cells.

766 (H) Percentage of p11<sup>+</sup> structures (phagocytic cups or phagosomes) containing WT,  
767  $\Delta hscA$ , or  $\Delta hscA$  conidia with 10  $\mu\text{g}/\text{mL}$  rHscA or rHsp70.

768 (I) Number of WT or  $\Delta hscA$  conidia associated with A549-Cas9 or p11-KO cells.

769 (J) Internalization in % of WT or  $\Delta hscA$  conidia by A549-Cas9 or p11-KO cells. For H–  
770 J, grey dots represent counting results of individual microscopy images and colored  
771 circles represent means of three individual experiments. Error bars represent the  
772 mean  $\pm$  SD. Different letters indicate significant difference based on multiple  
773 comparisons (Turkey method) after ANOVA of the pooled results of individual  
774 microscopy images.

775 (K and L) The level of p11 protein increased after *A. fumigatus* infection.

776 (K) Immunofluorescence staining of A549 cells infected with WT conidia of *A.*  
777 *fumigatus* with an anti-p11 antibody. Arrows indicate *A. fumigatus* conidia with induced  
778 p11<sup>+</sup> phagocytic cups. “#” marks a cell with low p11 staining intensity. Asterisks  
779 indicate p11<sup>+</sup> granules. See also Figure S4B.

780 (L) Western blot analysis of p11 and AnxA2 of A549 cells infected with WT conidia at  
781 indicated time points. Cell lysates were probed with p11, AnxA2, and  $\beta$ -actin  
782 antibodies. Relative band intensity is indicated. See also Figure S4D.

783 All scale bars, 10  $\mu\text{m}$ .

784 **Figure 4. Presence of p11 on phagosomal membrane prevents phagosome**  
785 **maturation.**

786 (A–C) p11 colocalizes with AnxA2 on phagosomes containing *A. fumigatus* conidia.

787 (A) Immunofluorescence detection of p11 and AnxA2 of A549 cells after 8 hours of  
788 incubation with conidia. A549 cells were washed and stained with CFW, anti-p11, and

789 anti-AnxA2 antibodies. Thin arrows indicate phagosomes that are both p11<sup>+</sup> and  
790 AnxA2<sup>+</sup>, open arrows mark phagosomes that are AnxA2<sup>+</sup> but p11<sup>-</sup>. Scale bars, 10  $\mu$ m.  
791 See also Figure S4D and S4E.

792 (B) Percentage of AnxA2<sup>+</sup>/p11<sup>-</sup> phagosomes (PSs) determined by the respective  
793 antibodies. A p11 knockdown was generated with p11-targeting siRNA. NTC, non-  
794 targeting control RNA.

795 (C) Western blot of lysates of A549 cells and eluates obtained from latex beads coated  
796 with the indicated proteins detected by different antibodies. p11 was precipitated with  
797 latex beads coated with rHscA. Magnetic latex beads with the size of 1  $\mu$ m were coated  
798 with rHscA or rHsp70 and were incubated with A549 cells for 8 hours. After washing  
799 off unbound beads with PBS (pH 7.4), cells were lysed by passing the cells through a  
800 27G needle in homogenization buffer (250 mM sucrose, 3 mM imidazole, pH 7.4).  
801 Extracts were probed with the indicated antibodies.

802 (D and E) A2ti-1 inhibits HscA-dependent recruitment of p11 on (D) PCs and (E) PSs.

803 (F–H) Immunofluorescence analyses of A549 cells infected with (F) WT or (G)  $\Delta$ *hscA*  
804 conidia, and (H) p11-KO cells infected with WT conidia. Cells were stained with an  
805 anti-p11 (green) and anti-Rab7 (red) antibody, extracellular germlings with CFW.  
806 White arrows indicate Rab7<sup>+</sup> phagosomes containing WT conidia. Green arrows mark  
807 a p11<sup>+</sup> phagosome containing WT conidia. Scale bars, 5  $\mu$ m. See also Figure S5A.

808 (I) Percentage of Rab7<sup>+</sup> phagosomes. A549 cells were incubated with 100  $\mu$ M A2ti-1  
809 or without (only DMSO) for 2 days before incubation with *A. fumigatus* conidia.  
810 Furthermore, A549-Cas9 and p11-KO cells were compared.

811 (J) Percentage of accumulated vesicles in the perinuclear region of A549-Cas9 and  
812 p11-KO cells. Error bars represent the mean  $\pm$  SD. \*\*\*p<0.001 (unpaired, two-tailed t  
813 test). See also Figure S3D.

814 (K–H) Recruitment of Rab11 and Sec15 to p11<sup>+</sup> phagosomes.

815 (K) Immunofluorescence of p11 and Rab11 in A549 cells after 8 hours of incubation  
816 with WT conidia. Arrows indicate phagosomes that are both p11<sup>+</sup> and Rab11<sup>+</sup>. Scale  
817 bar, 5  $\mu$ m. See also Figure S5B.

818 (L) Percentage of Rab11<sup>+</sup> phagosomes (PSs). A549-Cas9 cells and p11-KO cells  
819 were incubated with WT or  $\Delta hscA$  conidia.

820 (M) Immunofluorescence of p11 and Sec-15 in A549 cells after 8 hours of incubation  
821 with WT conidia. Arrows indicate phagosomes that are both p11<sup>+</sup> and Sec15<sup>+</sup>. Scale  
822 bar, 5  $\mu$ m. See also Figure S5C.

823 (N) Percentage of Sec15<sup>+</sup> phagosomes (PSs). A549 cells treated with NTC or p11-  
824 targeting siRNA were incubated with conidia of the indicated strains.

825 For B, D, E, I, L, and N, data are mean  $\pm$  SD; different letters indicate significant  
826 differences based on multiple comparisons (Turkey method) according to ANOVA.

827 **Figure 5. Exocytosis of *A. fumigatus* conidia by host cells.**

828 (A) Scheme illustrating the experimental set-up. *A. fumigatus* dormant conidia were  
829 incubated with A549 cells for four hours to internalize conidia. Conidia outside of host  
830 cells were counter-stained with CFW. After an additional four hours of incubation, cells  
831 were fixed, permeabilized and stained with mouse anti-p11 and rabbit anti-Rab11  
832 antibodies.

833 (B and C) *A. fumigatus* conidia escape phagosomes in A549 cells.

834 (B) Immunofluorescence images of potentially exocytosed conidia labeled with anti-  
835 p11 (green) and anti-Rab11 (red) antibodies are indicated by arrows.

836 (C) Percentage of *A. fumigatus* conidia attached to host cells with Rab11<sup>+</sup> PCs. A549  
837 or p11-KO cells were incubated with conidia of indicated strains as described in A.  
838 Cells were stained with anti-p11 and anti-Rab11 antibodies. Scale bars, 10  $\mu$ m. Data  
839 are mean  $\pm$  SD; different letters indicate significant differences based on multiple  
840 comparisons (Turkey method) according to ANOVA.

841 (D) Time-lapse image sequence showing exocytosis of WT conidium by A549 cells.  
842 The delivered conidium is indicated with arrows with different colors at different stages.  
843 Stage 1, the indicated conidium is inside a host cell; stage 2, the conidium is  
844 exocytosed to the surface of the host cell; stage 3, the conidium is retained at the host  
845 cell surface. Cell borders were indicated with green dotted line. Scale bar, 10  $\mu$ m. See  
846 also Video S1.

847 (E) Percentage of exocytosed conidia of indicated strains from A549 cells.

848 (F) Time-lapse image sequence showing transfer of *A. fumigatus* conidium from donor  
849 cell to recipient cell. The delivered conidium is indicated with arrows with different  
850 colors at different stages. Stage 1, the indicated conidium is inside a host cell; stage  
851 2, the conidium is transferred to another host cell; stage 3, the conidium is inside the  
852 recipient cell. Scale bar, 10  $\mu$ m. See also Video S2.

853 (G) Percentage of transfer of conidia of the indicated strains from one A549 cell to  
854 another cell.

855 **Figure 6. An SNP in the p11 gene (rs1873311) interferes with p11 production and**  
856 **is associated with an increased risk of IPA in stem cell transplant recipients.**

857 (A) Position of tag SNPs in human p11 gene. SNP rs1873311 is characterized by a  
858 change of thymine (T) to cytosine (C). Introns are indicated with grey blocks, exons  
859 are indicated with green blocks, the coding sequences (CDS) of p11 are indicated with  
860 magenta blocks. Scale bar, 1 kb. See also Figure S6A and Table S2.

861 (B) Cumulative incidence of IPA in allogeneic stem-cell transplant recipients according  
862 to donor rs1873311 genotypes. Data were censored at 24 months. Relapse and death  
863 were competing events. *p* value is for Gray's test. See also Tables S2 and S3.

864 (C–F) p11 excludes recruitment of Rab7 to phagosomes in human lung hematopoietic  
865 cells. Hematopoietic cells isolated from human lung tissues were infected with (C) WT  
866 or (D)  $\Delta$ *hscA* conidia for 3 hours. Cells were stained with an anti-p11 (green) and anti-  
867 Rab7 (red) antibody. Scale bars, 5  $\mu$ m.



868 (E and F) Statistical analysis of the percentage of (E) p11<sup>+</sup> phagosomes (PSs) and (F)  
869 Rab7<sup>+</sup> PSs containing conidia in human lung hematopoietic cells. Data are mean ±  
870 SD; \*p<0.05 (paired, two-tailed t test). See also Figure S5D.

871 (G) *A. fumigatus* infection increases p11 mRNA level in A549 cells but not H441 cells.  
872 qPCR analysis of p11 mRNA level in A549 cells (T/T) and H441 cells (T/C) after co-  
873 incubation of WT conidia with cells for 4 hours. Data are mean ± SD; \*p<0.05 (unpaired,  
874 two-tailed t test). p11 mRNA in H441 cells was not detected (n.d.). See also Figure  
875 S7B.

876 (H) p11 protein level in H441 cells is not up-regulated by *A. fumigatus* infection.  
877 Western blot analysis of lysates of H441 cells infected with conidia for 4 hours.  
878 Extracts were probed with the indicated antibodies.

879 (I) Relative immunofluorescence intensity of p11 induced by conidia in H441 cells for  
880 8 hours. Data are mean ± SD. ns, not significant (unpaired, two-tailed t test). See also  
881 Figure S7C.

882 (J–L) Percentage of (J) p11<sup>+</sup> phagocytic cups (PCs), (K) p11<sup>+</sup> PSs, and (L) Rab7<sup>+</sup> PSs-  
883 containing conidia in H441 cells after 8 hours of coincubation of cells with conidia of  
884 the indicates strains. Data are mean ± SD; different letters indicate significant  
885 differences based on multiple comparisons (Turkey method) according to ANOVA.  
886 See also Figure S7C.

887 **Figure 7. Model of HscA/p11-mediated re-direction of phagosomes to the**  
888 **exocytosis pathway.**

889 *A. fumigatus* infection induces the expression of the *S100A10* and the accumulation  
890 of its encoded protein p11, which forms heterotetramer (A2t) together with AnxA2, at  
891 the phagocytic cups. By binding of conidia to cells, the surface-exposed protein HscA  
892 on wild-type (WT) conidia stabilizes the tetrameric complex on the membrane of  
893 phagocytic cups and phagosomes. Presence of A2t on phagosomes excludes  
894 recruitment of Rab7 to phagosomes and promotes recruitment of Rab11 and Sec15,

895 which are markers of recycling endosomes. As a result, conidia either germinate in  
896 the less hostile A2t-positive phagosome (a) or are delivered back to the surface of the  
897 host cell. In the latter case, they are either transferred to another cell (b) or released  
898 into the medium (c). Without HscA ( $\Delta hscA$ ), p11 dissociates from AnxA2 on the  
899 phagosomal membranes. Rab7 is recruited to phagosomes and maturation of  
900 phagosomes continues to the (d) degradative pathway. Consequently,  
901 phagolysosomes concentrate at the perinuclear region where many lysosomes are  
902 located (Korolchuk et al., 2011) and conidia are killed. Figure was created with  
903 Biorender.com.

## 904 **Methods**

### 905 **Fungal strains and cultivation**

906 All strains used in this study are listed in Table S4. *A. fumigatus* conidia from WT and  
907 knockout strains were collected in water from AMM agar plates after 5 days of growth  
908 at 37°C, and were counted using a CASY® Cell Counter, as previously described (Jia  
909 et al., 2020). For germination assays, 10<sup>9</sup> *A. fumigatus* resting conidia were incubated  
910 at 37°C in RPMI 1640 (GIBCO) to produce swollen conidia (4 h), germlings (8 h), and  
911 hyphae (14 h), as described previously (Jia et al., 2020). For conidia production assay,  
912 10<sup>5</sup> conidia were spread on AMM agar plates. After incubation at 37°C for 5 days,  
913 conidia were collected in 10 mL water and counted using CASY® Cell Counter. For  
914 determination of their susceptibility to stressors, serial tenfold dilutions of conidia  
915 ranging from 10<sup>5</sup> to 10<sup>2</sup> in 1 µL H<sub>2</sub>O were spotted onto AMM agar plates containing 30  
916 µg/mL Congo red, 1 mM 1,4-dithiothreitol, 10 µg/mL tunicamycin, or 0.01% (w/v) SDS.  
917 Fungal growth was monitored over time and images were collected before overgrowth  
918 of the agar plates. For infection assays, *A. fumigatus* conidia were collected in water  
919 from malt agar (Sigma-Aldrich) plates respectively after 7 days of growth at room  
920 temperature (22°C). All conidia were harvested in sterile, double-distilled water.

921 **Strain construction, Southern and Northern blot analysis**

922 A split marker PCR strategy was used to replace the *hscA* gene (AFUB\_083640) with  
923 the hygromycin B phosphotransferase gene (*hph*) in protoplasts from *A. fumigatus*  
924 strain A1160 (CEA17  $\DeltaakuB^{KU80}$ ) (da Silva Ferreira et al., 2006). Briefly, a 1,085 bp  
925 upstream DNA fragment and a 986 bp downstream DNA fragment were amplified from  
926 genomic DNA of *A. fumigatus* strain A1160 by high-fidelity PCR using primers HscA-  
927 P1, HscA-P2 and HscA-P3, HscA-P4. The two generated DNA fragments were fused  
928 with the *hph* cassette (HYG-F and HYG-R) resulting in a 4,809 bp DNA fragment by  
929 split marker PCR. A similar strategy was used to generate the *hscA-gfp* strain. A 4,984  
930 bp fragment containing a 1,046 bp 3' region (without TAA, using primers HscA-P5 and  
931 HscA-P6) of *hscA*, a *gfp-ptrA* cassette (using primers PtrA-F, PtrA-R and plasmid  
932 pTH1 as template), and a 1,031 bp downstream region (using primers HscA-P7 and  
933 HscA-P8) of *hscA* was generated. The *gfp-ptrA* cassette was in-frame fused to *hscA*  
934 3' region. Then, the fragment was transferred to A1160 protoplasts.

935 To complement the  $\Delta hscA$  mutant, the intact *hscA* open reading frame,  
936 including 1,175 bp of upstream sequence and 683 bp of downstream sequence was  
937 amplified from genomic DNA by high-fidelity PCR using primers HscA-Com-F and  
938 HscA-Com-R. The resulting DNA fragment was cloned into plasmid pTH1 (Lapp et al.,  
939 2014) which was digested with *KpnI* and *NotI* to obtain plasmid pLJ-HscA-Comp. To  
940 generate plasmid pLJ-HscA-Myc, a DNA fragment containing 1,175 bp of upstream  
941 sequence and *hscA* without TAA was amplified from genomic DNA by high-fidelity  
942 PCR using primers HscA-Com-F and HscA-Myc-R. The DNA fragment was then  
943 inserted into plasmid pLJ-Hsp70-Myc (Jia et al., 2020) which was digested with *KpnI*  
944 and *HindIII*. Protoplasts of the  $\Delta hscA$  mutant were transformed with plasmids pLJ-  
945 HscA-Comp or pLJ-HscA-Myc to generate the respective *A. fumigatus* strains *hscAc*  
946 and *hscA-myc*.

947 For Southern blot analysis, chromosomal DNA of *A. fumigatus* was digested  
948 with *BamHI*. DNA fragments were separated in an agarose gel and blotted onto nylon

949 membranes (Carl ROTH). Northern blot analysis was performed as described  
950 previously (Valiante et al., 2016). Total RNA was extracted using a universal RNA  
951 purification kit (EURx). 10 µg of RNA was separated on a denaturing agarose gel and  
952 transferred onto positively charged nylon membranes (Carl ROTH). Probes were  
953 labeled with digoxigenin (DIG) by addition of DIG-11-dUTP (Jena Bioscience) to the  
954 PCR mixture. Probe A, synthesized with primers HscA-P8 and oJLJ19-18, probe B,  
955 synthesized with primers oJLJ19-45 and oJLJ19-46, were used for Southern blot  
956 analysis to verify the *hscA* mutant strain. Probe B was also used for Northern blot  
957 analysis to detect *hscA* expression. Probe C was synthesized using primers oJLJ19-  
958 33 and oJLJ19-42 to probe *hsp70* mRNA. Probes were detected with an anti-  
959 digoxigenin antibody (Roche).

#### 960 **Cell culture and reagents.**

961 Human lung epithelial cells A549 (Cat# 86012804-1VL, Sigma-Aldrich), human distal  
962 lung epithelial cells NCI-H441 (Cat# ATCC-CRM-HTB-174D, LGC) were cultured in F-  
963 12K Nut Mix medium (Kaighn's modification, Gibco) supplemented with 10% (v/v)  
964 artificial fetal calf serum (FCS) (HyClone FetalClone III serum, Cytiva). T7 mouse type-  
965 II alveolar epithelial cells (Cat# 07021402, ECACC) were cultured in F-12K Nut Mix  
966 medium supplemented with 5% (v/v) artificial FCS and with 0.5% (v/v) Insulin-  
967 Transferrin-Selenium (Thermo Fisher Scientific). BEAS-2B (Cat# CRL-9609<sup>TM</sup>, ATCC)  
968 were cultured in LHC-9 serum free medium (Thermo Fisher Scientific) in flasks  
969 precoated with LHC-9 medium supplemented with 0.01 mg/mL bovine fibronectin  
970 (Thermo Fisher Scientific), 0.03 mg/mL bovine collagen type I (Sigma-Aldrich) and  
971 0.01 mg/mL bovine serum albumin (BSA; Sigma-Aldrich). HepG2 cells (Cat# ACC 180,  
972 DSMZ) were cultured in RPMI-1640 medium supplemented with 10% (v/v) artificial  
973 FCS. A549 cells stably expressing Cas9 (Cat# SL504, GeneCopoiea) were cultured  
974 as mentioned above for A549 cells, but with addition of 800 µg/mL hygromycin  
975 (InvivoGen) as selection marker. All cells were cultivated at 37°C and 5% (v/v) CO<sub>2</sub>.

976 **Isolation of primary hematopoietic cells from human lung tissues.**

977 Healthy human lung tissue was collected during lung surgery on cancer patients  
978 (approved by the ethical committee of the Friedrich-Schiller University in Jena,  
979 Registration number: 2020-1894 1-Material). Tissue was aseptically removed from the  
980 non-tumor affected edges of resected lung wedges or lobes and stored in sterile  
981 phosphate-buffered saline (PBS) at 4°C. Tissues were processed between 4 and 24h  
982 after surgery. One cm<sup>3</sup> of the tissue was cut by surgical blade and chopped to smaller  
983 pieces by scissors. Enzyme mixture 1 (2 mL TrypLE Trypsin + 0.5 mL Dispase + 3 µL  
984 Elastase) or enzyme mixture 2 (2.5 mL Dispase + 3 µL Elastase + 5 µL DNase) was  
985 added in the falcon tube together with tissue and incubated 30 min at 37°C in water  
986 bath. After incubation, the mixture was strained through 70 µm and 30 µm cell strainer  
987 and washed thoroughly by DMEM/F12 medium (Gibco) and centrifuged at 300 g for  
988 10 min at 4°C. Cell pellet was resuspended in 2 mL Red blood cell lysis buffer (Roche)  
989 with 5 µL DNase (1 mg/mL), incubated for 2 min at room temperature and diluted with  
990 6 mL DMEM/F12 medium. After centrifugation at 300 g for 5 min at 4°C, cells were  
991 resuspended in 500 µL PEB buffer (autoMACS rinsing solution (Miltenyi Biotec) + 5  
992 µL DNase + 0.5% heat-inactivated FCS) with 10 µL FcR blocking reagent (Miltenyi  
993 Biotec), 10 µL biotin labeled anti-CD45 antibody (Miltenyi Biotec). After incubation for  
994 30 min at 4°C, cells were washed with 5 mL DMEM/F12 medium and centrifuged at  
995 300 g for 10 min at 4°C. Cell pellet was resuspended in 70 µL PEB buffer with 20 µL  
996 anti-biotin magnetic beads and incubated at 4°C for 15 min. After another wash with 5  
997 mL media, cells were resuspended in 1 mL PEB buffer and proceeded to magnetic  
998 separation on autoMACSpro separator (Miltenyi Biotec) with Possels program. Cells  
999 were counted and viability controlled by Trypan Blue staining (1:1 cell suspension +  
1000 Trypan Blue) and counted on LUNA-FL™ cell counter (Logos Biosystems). Cells (8 ×  
1001 10<sup>4</sup>) were seeded on fibronectin (bovine, 0.1 mg/mL) coated Millicell EZ SLIDE 8-Well  
1002 (Merck) in 300 µL media/well (RPMI + 10% FCS + 1% ultraglutamine + 1% Pen/Strep  
1003 + 1% HEPES + 1% Na-pyruvate + 1% MEM NEAA + 0.1% mercaptoethanol).

1004 **Knockdown and knockout of human p11 gene.**

1005 ON-TARGETplus Human S100A10 siRNA SMARTpool (Horizon Discovery) was used  
1006 to knockdown p11 expression. Briefly, 50  $\mu$ L per well of transfection solution  
1007 containing 125 nM siRNA and DharmaFECT (1:100) in serum-free F-12 K Nut Mix  
1008 medium was added to 8-well slides and incubated for 25 min.  $4 \times 10^4$  cells in 250  $\mu$ L  
1009 F-12 K Nut Mix medium supplemented with 10 % (v/v) FCS were then added to the  
1010 wells and incubated at 37°C with 5% (v/v) CO<sub>2</sub>. The medium was replaced by fresh  
1011 complete medium on the next day and cells were analyzed on day 3 after transfection  
1012 by immunoblotting. The A2t inhibitor A2ti-1 (MedChemExpress) was dissolved in  
1013 DMSO. A549 cells seeded at  $3 \times 10^4$  cells/well were incubated in an 8-well slide at  
1014 37°C with 100  $\mu$ M of A2ti-1 for 2 days before incubation with *A. fumigatus* conidia. In  
1015 control experiments, cells were treated with DMSO at the same concentrations used  
1016 for A2ti-1 delivery.

1017 To generate CRISPR-Cas9 p11 KO cells, A549-Cas9 (GeneCopoiea) cells  
1018 were transformed with a mixture of sgRNA plasmids, including HCP216549-SG01-3-  
1019 10-A, HCP216549-SG01-3-10-B, and HCP216549-SG01-3-10-C (GeneCopoiea, 0.5  
1020  $\mu$ g of each plasmid), using Lipofectamine 3000 reagent (Thermo Fisher Scientific).  
1021 Colonies derived from single cells were screened for p11 knockout using western blot  
1022 and immunofluorescence analysis. Knockouts were further confirmed by sequencing  
1023 the PCR fragment generated using primers oJLJ21-25 and oJLJ21-26. The genotype  
1024 of A549 cells (T/T, homozygous) and H441 cells (T/C, heterozygous), at the SNP  
1025 rs1873311 locus was confirmed by sequencing of PCR fragment generated using  
1026 primers oJLJ21-41 and oJLJ21-42.

1027 **Biotinylation of surface proteins**

1028 The surface biotinylation method was applied as described previously (Jia et al., 2020).  
1029 Briefly, the fungal conidia and mycelium were washed three times with PBS (pH 7.4),  
1030 and then incubated in 5 ml of PBS containing 5 mg EZ-Link Sulfo-NHS-LC-Biotin  
1031 (Thermo Fisher Scientific) for 30 min at 4°C. The reaction was terminated by addition

1032 of two volumes of 100 mM Tris-HCl (pH 7.4), and the reaction mixture was incubated  
1033 further for 30 min. Then the samples were washed another three times with PBS. After  
1034 addition of 1 mL of PBS containing protease inhibitor (Roche) and 500  $\mu$ L of 0.5-mm-  
1035 diameter glass beads (Carl ROTH), conidia, germlings, and hyphae were disrupted  
1036 using a FastPrep homogenizer with the following settings: 6.5 m/s, 3 times for 30 s  
1037 each time. The samples were then centrifuged at 16,000  $\times g$  for 10 min at 4°C.  
1038 Supernatants were collected and their total protein concentration determined by  
1039 Pierce™ Coomassie Plus™ (Bradford) Protein Assay.

#### 1040 **Production of antibody against HscA**

1041 To produce antibody against HscA, two synthesized antigen peptides Cys-  
1042 TMSLKLKRGNKEKIESALSDA and Cys-DYKKKELALKRLITKAMATR (Figure S1C)  
1043 were conjugated to KLH carrier and used for raising polyclonal antibody in rabbits  
1044 (ProteoGenix, France). The detection of HscA using polyclonal antibody was  
1045 performed by analyzing the protein extracts of *A. fumigatus* WT,  $\Delta hscA$ , *hscAc*, and  
1046 *hscA-myc* using western blotting.

#### 1047 **Western blotting**

1048 For detection of proteins on western blots, whole protein extracts from fungus or host  
1049 cells were separated on NuPAGE 4%–12% Bis-Tris Gels (Invitrogen) and transferred  
1050 to 0.2- $\mu$ m pore size PVDF membranes (Invitrogen) using the iBlot™ 2 Gel Transfer  
1051 Device (Thermo Fisher Scientific). Membranes were blocked by incubation in 5% (w/v)  
1052 milk powder or 1  $\times$  Western Blocking Reagent (Roche) in Tris-buffered saline and 0.1%  
1053 (v/v) Tween-20 for 1 h at room temperature. Primary antibody incubation was carried  
1054 out at 4°C overnight. The primary antibodies including the purified rabbit polyclonal  
1055 anti-HscA antibody (this study, 1:10,000), mouse monoclonal anti-biotin antibody  
1056 (Thermo Fisher Scientific, 1:2,000 dilution), mouse monoclonal anti-Hsp70 antibody  
1057 (Thermo Fisher Scientific, 1:1,000 dilution), rabbit polyclonal anti-Myc antibody (Cell

1058 Signaling Technology, 1:5,000 dilution), mouse monoclonal anti-Strep antibody (IBA,  
1059 1:1,000 dilution), mouse monoclonal anti-GFP antibody (Santa Cruz, 1:1,000 dilution),  
1060 mouse monoclonal anti-p11 antibody (BD, 1:1,000 dilution), rabbit polyclonal anti-p11  
1061 antibody (1:1,000 dilution), rabbit monoclonal anti-AnxA2 antibody (Cell Signaling  
1062 Technology, 1:2,000 dilution), rabbit monoclonal anti- $\beta$ -actin antibody (Cell Signaling  
1063 Technology, 1:2,000 dilution), and mouse monoclonal anti-GAPDH antibody  
1064 (Proteintech, 1:2,000 dilution) were used. Hybridization of primary antibody with an  
1065 HRP-linked anti-mouse IgG (Cell Signaling Technology) or HRP-linked anti-rabbit IgG  
1066 (Abcam) was performed for 1 h at room temperature. Chemiluminescence of HRP  
1067 substrate (Millipore) was detected with a Fusion FX7 system (Vilber Lourmat,  
1068 Germany).

#### 1069 **Production of purified recombinant HscA and Hsp70**

1070 The coding sequences of *hscA* (with primers AfhscANdelf and AfhscABamHlr) and  
1071 *hsp70* (with primers Afhsp70Ndelf and Afhsp70BamHlr) were PCR amplified from *A.*  
1072 *fumigatus* cDNA. The generated DNA fragments were cloned into the vector pNATST  
1073 (modified pET15b vector encoding an N-terminal Twin-Strep-tag followed by a tobacco  
1074 etch virus (TEV) protease site). Recombinant proteins were produced in *E. coli* BL21  
1075 (DE3) cells (New England Biolabs) by auto induction (Overnight Express Instant TB  
1076 Medium, Novagen) at 25°C. Bacterial cells were then harvested by centrifugation  
1077 (10,500 × g) and stored at -80°C. Frozen bacterial cells were resuspended in lysis  
1078 buffer (100 mM Tris/HCl, 150 mM NaCl, 1 mM AEBSF, 0.5% (v/v) BioLock, pH 8.0)  
1079 and disrupted at 1000 bar using a high-pressure homogenizer (Emulsiflex C5, Avestin).  
1080 After centrifugation (48,000 × g) and filtration of the lysates through a 1.2  $\mu$ m  
1081 membrane, recombinant proteins were purified by affinity chromatography using a 5  
1082 mL Strep-Tactin<sup>TM</sup>XT superflow<sup>TM</sup> high capacity column (IBA). Proteins were eluted  
1083 from the column with biotin elution buffer (100 mM Tris/HCL, 150 mM NaCl, 1 mM  
1084 EDTA, 50 mM biotin, pH 8.0). A HiPrep 26/10 Desalting column (Cytiva) was used to



1085 transfer fractionated HscA and Hsp70 peaks to storage buffer (20 mM HEPES, 150  
1086 mM NaCl, 5 mM MgCl<sub>2</sub>, 10% glycerol (v/v), 1 mM TCEP, pH 7.5).

### 1087 **Proteomics analysis**

1088 To identify the protein(s) from A549 cells binding to HscA, we incubated 10 mg of A549  
1089 cell protein extracts with 50 µg purified recombinant HscA protein for 2 h at 4°C.  
1090 Proteins were then purified using Strep-Tactin<sup>®</sup>XT spin column kit (IBA). Reduction  
1091 and alkylation of cysteine thiols was performed by addition of 5 mM tris(2-  
1092 carboxyethyl)phosphine and 6.25 mM 2-chloroacetamide (final concentrations)  
1093 followed by incubation at 70°C for 30 min. Subsequently, proteins were dried in a  
1094 vacuum concentrator (Eppendorf) and resolubilized in 50 µL of 100 mM TEAB.  
1095 Proteolytic digestion was carried out with a trypsin/Lys-C mixture (Promega) incubated  
1096 for 18 h at 37°C at a protein to protease ratio of 25:1. Tryptic peptides were evaporated  
1097 in a vacuum concentrator until dryness, resolubilized in 25 µL of 0.05% trifluoroacetic  
1098 acid in 98:2 H<sub>2</sub>O/acetonitrile (v/v) and filtrated through a 0.2 µm spin filter (Merck  
1099 Millipore Ultrafree<sup>®</sup>-MC, hydrophilic PTFE) at 14,000 × g for 15 min. Filtrated peptides  
1100 were transferred into HPLC vials and analyzed by LC-MS/MS.

1101 LC-MS/MS analysis was performed on an Ultimate 3000 nano RSLC system  
1102 connected to a QExactive HF mass spectrometer (both Thermo Fisher Scientific,  
1103 Waltham, MA, USA). Peptide trapping for 5 min on an Acclaim Pep Map 100 column  
1104 (2 cm × 75 µm, 3 µm) at 5 µL/min was followed by separation on an analytical Acclaim  
1105 Pep Map RSLC nano column (50 cm × 75 µm, 2µm). Mobile phase gradient elution of  
1106 eluent A (0.1% (v/v) formic acid in water) mixed with eluent B (0.1% (v/v) formic acid  
1107 in 90/10 acetonitrile/water) was performed using the following gradient: 0 min at 4% B,  
1108 5 min at 8% B, 20 min at 12% B, 30 min at 18% B, 40 min at 25% B, 50 min at 35%  
1109 B, 57 min at 50% B, 62-65 min at 96% B, 65.1-90 min at 4% B. Positively charged ions  
1110 were generated at spray voltage of 2.2 kV using a stainless steel emitter attached to  
1111 the Nanospray Flex Ion Source (Thermo Fisher Scientific). The quadrupole/orbitrap

1112 instrument was operated in Full MS / data-dependent MS2 Top15 mode. Precursor  
1113 ions were monitored at  $m/z$  300–1500 at a resolution of 60,000 FWHM (full width at  
1114 half maximum) using a maximum injection time (ITmax) of 100 ms and an AGC  
1115 (automatic gain control) target of  $1 \times 10^6$ . Precursor ions with a charge state of  $z = 2$ –  
1116 5 were filtered at an isolation width of  $m/z$  2.0 amu for further HCD fragmentation at  
1117 30% normalized collision energy (NCE). MS2 ions were scanned at 15,000 FWHM  
1118 (ITmax = 80 ms, AGC =  $2 \times 10^5$ ) using a fixed first mass of  $m/z$  120 amu. Dynamic  
1119 exclusion of precursor ions was set to 20 s. The LC-MS/MS instrument was controlled  
1120 by Chromeleon 7.2, QExactive HF Tune 2.8 and Xcalibur 4.0 software.

1121 Tandem mass spectra were searched against the UniProt databases  
1122 (2020/07/13; YYYY/MM/DD) of *Homo sapiens*  
1123 (<https://www.uniprot.org/proteomes/UP000005640>) and *Neosartorya fumigata*  
1124 (*Aspergillus fumigatus*) Af293 (<https://www.uniprot.org/proteomes/UP000002530>)  
1125 using Proteome Discoverer (PD) 2.4 (Thermo Fisher Scientific) and the algorithms of  
1126 Mascot 2.4.1 (Matrix Science, UK), Sequest HT (version of PD2.4), MS Amanda 2.0,  
1127 and MS Fragger 2.4. Two missed cleavages were allowed for the tryptic digestion.  
1128 The precursor mass tolerance was set to 10 ppm and the fragment mass tolerance  
1129 was set to 0.02 Da. Modifications were defined as dynamic Met oxidation, protein N-  
1130 term acetylation and Met-loss as well as static Cys carbamidomethylation. A strict false  
1131 discovery rate (FDR) < 1% (peptide and protein level) and a search engine score  
1132 of >30 (Mascot), > 4 (Sequest HT), >300 (MS Amanda) or >8 (MS Fragger) were  
1133 required for positive protein hits. The Percolator node of PD2.4 and a reverse decoy  
1134 database was used for q value validation of spectral matches. Only rank 1 proteins  
1135 and peptides of the top scored proteins were counted. Label-free protein quantification  
1136 was based on the Minora algorithm of PD2.4 using the precursor abundance based  
1137 on intensity and a signal-to-noise ratio>5. Relative abundance of protein was  
1138 calculated as PSM (peptide spectrum matches)/protein length/total PSM.

1139 **Infection experiments of cells.**

1140 For infection experiments, *A. fumigatus* conidia were collected in water from malt agar  
1141 (Sigma-Aldrich) plates respectively after 7 days of growth at room temperature (22°C).  
1142 A549 and H441 epithelial cells were seeded in Millicell EZ SLIDE 8-Well at a density of  
1143  $3 \times 10^4$  cells per well and incubated overnight at 37°C in a humidified chamber at 5 %  
1144 (v/v) CO<sub>2</sub>. Conidia were added at a multiplicity of infection (MOI) of 10.  
1145 Synchronization of infection was achieved by centrifugation for 5 min at 100 × *g*. For  
1146 immunofluorescence and microscopy, infection of A549 cells and H441 cells was  
1147 allowed to proceed for 8 h and infection of primary hematopoietic cells was proceeded  
1148 for 3 h at 37°C in the humidified chamber at 5% (v/v) CO<sub>2</sub>. For LDH release assay,  
1149 A549 cells were seeded in 24-well plate at a density of  $2 \times 10^5$  cells per well, and the  
1150 incubation was extended to 20 h. LDH activity was measured using the CyQuant LDH  
1151 cytotoxicity assay (Thermo Fisher Scientific) following the manufacturer's instructions.

1152 **Immunofluorescence and microscopy**

1153 A549 cells were seeded in Millicell EZ SLIDE 8-Well at a density of  $3 \times 10^4$  cells per well  
1154 1 day before treatment and processing for immunofluorescence staining. To stain the  
1155 *A. fumigatus* proteins binding to host cells, living cells were incubated with 20 µg *A.*  
1156 *fumigatus* protein extracts or 2 µg purified rHscA or rHsp70 protein at room  
1157 temperature for 1 h. After three times of washing with PBS, cells were stained with  
1158 Alexa Fluor 488-conjugated streptavidin (Thermo Fisher Scientific) at room  
1159 temperature for 1 h to detect biotinylated *A. fumigatus* surface proteins binding to host  
1160 cells. To stain host cell binding of HscA-GFP protein, cells were incubated with a rabbit  
1161 anti-GFP primary antibody (Abcam) for 2 h at room temperature and a secondary  
1162 antibody for 1 h at room temperature in the dark. To stain host cell binding of purified  
1163 rHscA protein, StrepMAB-Classic DY-488 or StrepMAB-Classic DY-549 (IBA) were  
1164 used to stain the cells. For staining of phagosomal markers, cells were first incubated  
1165 with 250 µg/mL calcofluor white for 10 min at room temperature, as described

1166 previously (Thywißen et al., 2011), to stain exclusively extracellular conidia. After three  
1167 washing steps with PBS, cells were fixed for 10 min with 3.7 % (v/v) formaldehyde,  
1168 membranes were permeabilized for 10 min with 0.1 % (v/v) Triton X-100/PBS and  
1169 blocked for 30 min with 1 % (w/v) BSA/PBS. Cells were incubated with primary  
1170 antibodies at 4°C overnight, followed by incubation with secondary goat anti-mouse  
1171 IgG Alexa Fluor 488 or goat anti-rabbit IgG DyLight 633 (Thermo Fisher Scientific). To  
1172 determine phagolysosomal acidification, 50 nM LysoTracker Red DND-99 (Thermo  
1173 Fisher Scientific) was added to A549 epithelial cells 4 h after infection. After another 4  
1174 hours of incubation, cells were stained with CFW (Sigma-Aldrich) for 10 min, and fixed  
1175 for 10 min with 3.7 % (v/v) formaldehyde. Samples were visualized using a Zeiss LSM  
1176 780 confocal microscope or a Zeiss Axio Imager M2 microscope and processed with  
1177 the Zeiss ZEN software.

1178 For quantification, at least 10 individual images of host cells infected with *A.*  
1179 *fumigatus* conidia were counted for each experiment of at least three biological  
1180 replicates. The numbers of extracellular conidia attached to host cells, internalized  
1181 conidia, phagosomes with positive markers, phagocytic cups, and host cells were  
1182 counted. The association of conidia with cells was calculated as: (number of  
1183 internalized conidia + number of conidia attached to the host cells) / number of host  
1184 cells. The percentage of internalized conidia was calculated as follows: number of  
1185 internalized conidia / (number of internalized conidia + number of conidia attached to  
1186 the host cells) × 100. The percentage of phagosomes with a positive marker was  
1187 calculated as follows: number of phagosomes with a positive marker / number of  
1188 internalized conidia × 100. The percentage of p11<sup>+</sup> phagocytic cups was calculated as  
1189 follows: number of p11<sup>+</sup> conidia attached to host cells / number of conidia attached to  
1190 host cells × 100. The percentage of exocytosed conidia was calculated: number of  
1191 attached conidia with a Rab11<sup>+</sup> phagocytic cup / number of total conidia × 100.

1192 For live cell imaging, 5 × 10<sup>4</sup> A549 cells were cultured overnight in eight-well  
1193 slides (Ibidi) and were infected with *A. fumigatus* conidia at MOI = 5 for four hours.

1194 The cells were then washed with pre-warmed medium and kept inside an incubation  
1195 chamber at 37°C, 5% (v/v) CO<sub>2</sub> before carrying out live cell imaging. Confocal time  
1196 lapse sequences were captured using a Zeiss LSM 780 confocal microscope using a  
1197 Plan-Apochromat 20x/0.8 M27 objective lens. Images were generated with a 561 nm  
1198 diode-pumped solid-state laser and collected by the transmitted light photomultiplier  
1199 tube of the LSM 780 system. Images were collected for 4 hours at 1–10 sec intervals  
1200 as Z stacks with 2000 nm Z spacing, recording 9–22 confocal slices at each time point.  
1201 Images consisted of 1024 by 1024 pixels at a voxel size of 415 × 415 × 2000 nm.  
1202 Quantification of conidia which were exocytosed or transferred between cells were  
1203 carried out by counting total internalized conidia per replicate.

#### 1204 **Incubation of latex beads with cells.**

1205 Latex beads were coated as previously described (Dersch and Isberg, 1999). Briefly,  
1206 20 µL of bead solution were sequentially washed in 1 mL PBS and 1 mL coupling  
1207 buffer (0.2 M Na<sub>2</sub>HCO<sub>3</sub>, pH 8.5 and 0.5 M NaCl), and were resuspended in 100 µL of  
1208 coupling buffer. Purified rHscA and rHsp70 proteins were added in a concentration of  
1209 0.5 mg/mL. The suspensions were incubated at 37°C for 30 min. After adding 500 µL  
1210 of coupling buffer, the suspensions were sonicated for 5 min. For blocking of beads,  
1211 500 µL of 10 mg/mL BSA in coupling buffer was added and it was incubated at 37°C  
1212 for 1 hour. The beads were washed in 1 mL PBS with 10 mg/mL BSA and stored in  
1213 200 µL of PBS containing 2 mg/mL BSA at 4°C. Presence of recombinant proteins on  
1214 the surface of coated beads were verified by detection of Strep tag using  
1215 immunofluorescence microscopy (Figure 2K).

1216 To quantify the association of latex beads with host cells, fluorescent latex  
1217 beads (Sigma-Aldrich) coated with recombinant protein were added to A549 cells  
1218 seeded in Millicell EZ SLIDE 8-Well at a density of 3 × 10<sup>4</sup> cells per well at MOI = 20.  
1219 After 8 hours of incubation at 37°C and 5% (v/v) CO<sub>2</sub>, cells were washed three times  
1220 with PBS and then fixed with 3.7 % (v/v) formaldehyde. The slides were examined

1221 using immunofluorescence microscopy. The association index is calculated as  
1222 number of latex beads per cell divided by the number of BSA-coated latex beads per  
1223 cell.

1224 To isolate host proteins associated with latex beads, we coated magnetic latex  
1225 beads (Sigma-Aldrich, 1  $\mu\text{m}$  mean particle size) with rHscA or rHsp70 respectively.  
1226 The beads were incubated with A549 cells for 8 hours at MOI = 20. After washing-off  
1227 the unbound beads with PBS, cells were lysed by passing the cells through a 27G  
1228 needle in homogenization buffer (250 mM sucrose, 3 mM imidazole, pH 7.4), as  
1229 previously described (Goldmann et al., 2021). After 5 times of washing with PBS,  
1230 proteins associated with latex beads were eluted in protein loading buffer and  
1231 analyzed by Western blotting.

### 1232 **RNA extraction and qPCR analysis**

1233 RNA isolation from cells was performed using the Universal RNA purification Kit  
1234 (Roboklon GmbH, Berlin, Germany).  $3 \times 10^5$  of A549 or H441 cells were co-incubated  
1235 with *A. fumigatus* conidia with MOI = 10 for 4 hours at 37°C and 5% (v/v) CO<sub>2</sub>. Cells  
1236 were lysed in 400  $\mu\text{L}$  buffer RL containing 10% (v/v)  $\beta$ -mercaptoethanol. RNA was  
1237 extracted following manufacturer's protocol for cell culture RNA purification.  
1238 Complementary DNA (cDNA) was synthesized from RNA using the Maxima H Minus  
1239 First Strand cDNA Synthesis Kit (Thermo Fisher Scientific). Real-time qPCR was  
1240 performed using iTaq™ Universal SYBR® Green Supermix (Bio-rad) on a  
1241 QuantStudio3 real-time PCR system (Thermo Fisher Scientific) with the following  
1242 thermal cycling profile: 95°C for 20 s, followed by 40 cycles of amplification (95°C for  
1243 5 s, 58°C for 34s). 18s ribosomal RNA was used as an endogenous control for  
1244 normalization.

### 1245 **Co-immunoprecipitation**

1246 One 182 cm<sup>2</sup>-flask of 80% confluent A549 cells was incubated with 20 mg crude  
1247 protein extract of *A. fumigatus* for 2 h at 37°C. After 5 times of washing with PBS, cells  
1248 were incubated with 1 mM DSP (dithiobis(succinimidyl propionate), Thermo Fisher  
1249 Scientific) at room temperature for 30 min. The reaction was quenched with 10 mM  
1250 Tris-HCl (pH 7.4), and the cells were lysed in 500 µL of IP lysis buffer (Thermo Fisher  
1251 Scientific) with protease inhibitor (Roche). The lysates were centrifuged at 16,000 × *g*  
1252 for 10 min at 4°C. The HscA-GFP protein was precipitated with GFP-trap magnetic  
1253 agarose (ChromoTek). The co-immunoprecipitation of p11, AnxA2, and HscA-GFP  
1254 was analyzed via western blotting.

### 1255 **Genetic association study**

1256 The genetic association study with IPA was performed in a total of 483 hematological  
1257 patients of European ancestry undergoing allogeneic hematopoietic stem-cell  
1258 transplantation at Instituto Português de Oncologia, Porto, and at Hospital de Santa  
1259 Maria, Lisbon was enrolled in the IFIGEN study between 2009 and 2016. The  
1260 demographic and clinical characteristics of the patients are summarized in Table S3.  
1261 Cases of probable/proven IPA were identified according to the standard criteria from  
1262 the European Organization for Research and Treatment of Cancer/Mycology Study  
1263 Group (EORTC/MSG) (De Pauw et al., 2008). Patients diagnosed with “possible”  
1264 invasive fungal infection or with a pre-transplant infection were excluded from the  
1265 study. Approval for the IFIGEN study was obtained from the SECVS (no. 125/014),  
1266 the Ethics Committee for Health of the Instituto Português de Oncologia - Porto,  
1267 Portugal (no. 26/015), the Ethics Committee of the Lisbon Academic Medical Center,  
1268 Portugal (no. 632/014), and the National Commission for the Protection of Data,  
1269 Portugal (no. 1950/015). Experiments were conducted according to the principles  
1270 expressed in the Declaration of Helsinki, and participants provided written informed  
1271 consent.

1272 **SNP selection and genotyping**

1273 Genomic DNA was isolated from whole blood using the QIAcube automated system  
1274 (Qiagen). SNPs were selected based on their ability to tag surrounding variants with  
1275 a pairwise correlation coefficient  $r^2$  of at least 0.80 and a minor allele frequency  $\geq 5\%$   
1276 using publicly available sequencing data from the Pilot 1 of the 1000 Genomes Project  
1277 for the CEU population. Genotyping was performed using KASPar assays (LGC  
1278 Genomics) in an Applied Biosystems 7500 Fast Real-Time PCR system (Thermo  
1279 Fisher Scientific), according to the manufacturer's instructions.

1280 **Statistical analysis**

1281 Statistical analysis was performed using Prism 7. One-way ANOVA was used to  
1282 analyze experimental data with more than two experimental groups followed by  
1283 Tukey's multiple comparisons test. Two-tailed unpaired Student's t test was  
1284 additionally used for data analysis. The probability of IPA according to *S100A10*  
1285 genotypes was determined using the cumulative incidence method and compared  
1286 using Gray's test (Gray, 1988). Cumulative incidences at 24 months were computed  
1287 with the *cmprsk* package for R version 2.10.1 (Scrucca et al., 2007), with censoring of  
1288 data at the date of last follow-up visit and relapse and death as competing events. All  
1289 clinical and genetic variables achieving a p-value  $\leq 0.15$  in the univariate analysis were  
1290 entered one by one in a pairwise model together and kept in the final model if they  
1291 remained significant ( $p < 0.05$ ). Multivariate analysis was performed using the  
1292 subdistribution regression model of Fine and Gray with the *crr* function for R (Scrucca  
1293 et al., 2010).

1294 **Supplemental information**

1295 **Figure S1. Verification and phenotypic analysis of *A. fumigatus hscA* mutant**  
1296 **strains** (see also Figure 1).



1297 (A) Scheme of the organization at the chromosomal *hscA* locus of the different *A.*  
1298 *fumigatus* strains. Size of generated DNA fragments by *Bam*HI restriction and binding  
1299 sites of hybridization probe A and B are indicated. *ptrA*, pyrithiamine resistance gene  
1300 (B) Southern blot analysis of chromosomal DNA cut by *Bam*HI to confirm the  
1301 generated recombinant *A. fumigatus* strains. A DNA band obtained with probes A and  
1302 B with the size of 6.3 kbp is characteristic of the WT strain, a band obtained with probe  
1303 A with the size of 4.7 kbp of  $\Delta$ *hscA* strain and 5.3 kbp of *hscA-gfp* strain. A band  
1304 obtained with probe B with the size of 3.1 kbp is indicative of both strain *hscA-gfp* and  
1305 *hscAc*.  
1306 (C) Schematic representation of HscA-Myc substrate binding domains (SBDs)  
1307 consisting of SBD- $\beta$  (purple) and SBD- $\alpha$  (lid domain, red) (Gumiero et al., 2016). Myc  
1308 tag (M) was fused to the C-terminus of SBD. Positions of antigens 1 and 2 used for  
1309 polyclonal antibody generation are marked with red lines. Lysine residues with  
1310 biotinylation marks are indicated (Jia et al., 2020).  
1311 (D) Western blot of protein extracts from dormant conidia of indicated strains with  
1312 antibodies against HscA, Myc-tag, Hsp70, or GAPDH. Conidia were harvested from  
1313 malt agar plates after 7 days of cultivation at 22°C.  
1314 (E) Western blot of HscA in dormant conidia. Strains *hscA-myc* and *hscA-gfp* were  
1315 inoculated on AMM or malt agar and incubated at 22°C or 37°C for 7 days. Protein  
1316 extracts from dormant conidia were probed with anti-Myc, anti-GFP or anti-GAPDH  
1317 antibodies. See also Figure 1F and 1G.  
1318 (F) Western blot for the detection of the HscA-GFP fusion protein with an anti-GFP  
1319 antibody.  
1320 (G) DNA sequence of the fusion site of genes *hscA* and *gfp* present in the *hscA-gfp*  
1321 strain. The DNA fragment containing the 3' region of *hscA* and the 5' region of *gfp* was  
1322 PCR amplified using the primer pair oJLJ19-45 and oJLJ18-57, and then sequenced  
1323 using primer oJLJ19-45.

1324 (H) Immunofluorescence staining of Hsp70 localized on the surface of *hscA-gfp*  
1325 dormant conidia with the anti-Hsp70 antibody. Conidia incubated with secondary  
1326 antibody served as negative control.

1327 (I) Immunofluorescence staining of HscA-GFP binding to A549 cells. A549 cells were  
1328 incubated with protein extracts of strain *hscA-gfp* at room temperature for 1 h. Cells  
1329 were then incubated with anti-GFP antibody or anti-Hsp70 antibody. A549 cells  
1330 without incubation with fungal protein extracts served as negative control.

1331 (J) Immunofluorescence staining of HscA-GFP binding to A549 cells. A549 cells were  
1332 incubated with protein extracts of strains *hscA-gfp* or *ccpA-gfp* at room temperature  
1333 for 1 h. Cytoplasmic membrane of A549 cells was stained with Oregon Green™ 488  
1334 conjugated wheat germ agglutinin (WGA). Protein was stained with anti-GFP antibody.  
1335 For H–J, goat anti-rabbit IgG Dylight 633 or goat anti-mouse IgG Dylight 633 were  
1336 used to detect primary antibodies. Scale bars, 10  $\mu$ m.

1337 (K–O) *hscA* gene deletion caused no severe growth defects.

1338 (K) Images of serial 10-fold dilutions of conidia of the indicated *A. fumigatus* strains  
1339 inoculated onto AMM agar and incubated for 4 days at 22°C, or 2 days at 37°C or  
1340 42°C.

1341 (L) Colony diameter of indicated strains.  $10^5$  conidia were inoculated at the center of  
1342 AMM agar plates and incubated at the indicated temperatures for 3 days.

1343 (M) Number of conidia of indicated strains on AMM agar plates after 3 days of  
1344 incubation at 37°C.  $10^5$  conidia were freshly harvested and spread onto AMM agar  
1345 plates. Conidia were harvested from each agar plate with 10 mL of sterile water.

1346 (N) Number of germlings of the indicated *A. fumigatus* strains incubated in RPMI  
1347 medium for 8 hours at 37°C.

1348 Data are mean  $\pm$  SD; different letters indicate significant differences based on multiple  
1349 comparisons (Turkey method) according to ANOVA.

1350 (O) Images of serial 10-fold dilutions of conidia of the indicated strains that were  
1351 spotted on AMM agar plates containing 30 µg/mL Congo red, 1mM DTT, 10 µg/mL  
1352 tunicamycin, or 0.01% (w/v) SDS at 37°C for 2 or 3 days.

1353 **Figure S2. Identification of potential binding partners of HscA** (see also Figure 3).

1354 (A and B) Pre-treatment of A549 cells with (A) trypsin or (B) formaldehyde abolished  
1355 binding of HscA to A549 cells.

1356 (A) Immunofluorescence staining of A549 cells incubated with protein extract of  
1357 dormant conidia for 1 h at room temperature and stained with anti-GFP antibody after  
1358 pre-treatment of A549 cells with trypsin. A549 cells were suspended in enzyme-free  
1359 dissociation buffer or trypsin digestion buffer.

1360 (B) Immunofluorescence of A549 cells pre-fixed with 4% (v/v) formaldehyde in PBS.  
1361 Then, cells were incubated with rHscA or protein extracts from strains *hscA-gfp* or  
1362 *ccpA-gfp* for 1h at room temperature followed by detection using indicated antibodies.  
1363 All scale bars, 10 µm.

1364 (C) SDS-PAGE of A549 protein extracts incubated with the indicated recombinant  
1365 proteins. A549 cell lysates were incubated in IP buffer, with rHscA or rHsp70 for 2 h  
1366 at 4°C. Samples were purified by Strep-Tactin®XT spin columns, and then analyzed  
1367 by LC-MS/MS. Molecular masses of standard proteins indicated on the left side.

1368 **Figure S3. Knockout of the p11 gene in A549 cells** (see also Figure 3).

1369 (A) Verification of generated p11-KO cell line by DNA sequencing. A 704 bp DNA  
1370 fragment was amplified from A549-Cas9 cell line or p11-KO cell line and sequenced  
1371 using primers oJLJ21-25 and oJLJ21-26. The DNA fragment obtained from p11-KO  
1372 cells was further cloned into pJET1.2 for DNA sequencing. As indicated with red boxes,  
1373 deletion of ten base pairs in allele 1 and two single base pairs in allele 2 causes a  
1374 frame shift of the p11-coding sequence and results in a p11 knockout.

1375 (B) Western blot of protein extracts of A549 cell lines A549-Cas and p11 knockout  
1376 p11-KO with antibodies against p11, AnxA2, or  $\beta$ -actin.  
1377 (C) Immunofluorescence staining of p11 in cell lines infected with WT conidia. Arrows  
1378 indicate p11<sup>+</sup> phagocytic cups. See also Figure 3F.  
1379 (D) Microscopic image of perinuclear localization of vesicles in p11-KO cells. See also  
1380 Figure 4H.  
1381 Scale bars, 10  $\mu$ m.

1382 **Figure S4. p11 protein level increases by *A. fumigatus* infection** (see also Figure  
1383 3 and Figure 4).

1384 (A) Immunofluorescence staining of AnxA2 and p11 on phagocytic cups (upper row)  
1385 and phagosomes (bottom row) of A549 cells infected with WT conidia for 8 h. Arrows  
1386 indicate a phagosome containing conidia. Extracellular conidia and germlings were  
1387 stained with CFW. Cells were stained with anti-p11 and anti-AnxA2 antibodies. See  
1388 also Figures 3F and 4A.

1389 (B–D) p11 protein level is upregulated after *A. fumigatus* infection.

1390 (B) Immunofluorescence staining of p11 in A549 cells infected without or with *A.*  
1391 *fumigatus* for 8 hours at MOI = 10. Arrows indicate an extracellular germling with p11  
1392 staining. Extracellular *A. fumigatus* conidia and germlings were stained with CFW.  
1393 Cells were stained with anti-p11 antibody. See also Figure 3K.

1394 (C) Relative immunofluorescence intensity of p11 induced by fungal infection. Error  
1395 bars represent the mean  $\pm$  SEM. \* $p < 0.05$  (unpaired, two-tailed t test).

1396 (D) Western blot showing induction of p11 protein expression by  $\Delta hscA$  conidia or IFN- $\gamma$ .  
1397 Incubation of A549 cells with  $\Delta hscA$  conidia (MOI = 10) or IFN- $\gamma$  (50 ng/mL) for  
1398 indicated time; cell lysates were analyzed by Western blot analysis and probed with  
1399 anti-p11, anti-AnxA2 or anti- $\beta$ -actin antibodies. See also Figure 3L.

1400 (E) Knockdown of p11 expression in A549 cells with p11-targeting siRNA. After  
1401 incubation of cells with indicated concentrations of p11-targeting siRNA or non-

1402 targeting control siRNA (NTC, 25 nM) for 48 h, cell lysates were probed with anti-p11,  
1403 anti-AnxA2 or anti-GAPDH antibodies.

1404 Scale bars, 10  $\mu$ m.

1405 **Figure S5. Differential recruitment of p11 and Rab proteins to phagosomes** (see  
1406 also Figure 4 and Figure 6).

1407 (A–C) Recruitment of phagosomal markers to latex beads with a diameter of 3  $\mu$ m  
1408 coated with protein rHscA or rHsp70. After incubation of A549 cells with the beads for  
1409 8 h, cells were fixed, permeabilized, and stained with the indicated antibodies: (A) anti-  
1410 p11 and anti-Rab7; (B) anti-p11 and anti-Rab11; (C) anti-p11 and anti-Sec15.

1411 (D) HscA recruits p11 to and excludes Rab7 from phagosomes containing latex beads  
1412 in macrophages. After incubation of primary lung macrophages with beads for 3 h,  
1413 cells were fixed, permeabilized, and stained with an anti-p11 antibody and an anti-  
1414 Rab7 antibody. See also Figure 6C and 6D.

1415 Scale bars, 10  $\mu$ m. White arrows indicate positive staining of phagosomes by indicated  
1416 antibodies.

1417 **Figure S6. Sequence analysis of SNPs in *S100A10* (p11) gene** (see also Figure 6).

1418 (A) Graphical view of the haplotype-based tagging strategy for the SNPs in the  
1419 *S100A10* gene. SNPs with a minor allele frequency (MAF) above 0.05 were selected  
1420 from the publicly available sequencing data from the Pilot 1 of the 1000 Genomes  
1421 Project for the CEU population (Northern Europeans from Utah). Tag SNPs are  
1422 indicated with the red circles and nsSNPs are indicated with blue circles. Linkage  
1423 disequilibrium (LD) values were used to define LD blocks tagged by each SNP. See  
1424 also Figure 6A.

1425 (B) DNA sequences of cell lines A549 and H441 at the rs1873311 SNP locus. DNA  
1426 fragments were PCR amplified using primers oJLJ21-41 and oJLJ21-42. The  
1427 sequence shows the C/T heterozygous genotype of the H441 cell line.

1428 (C–E) Alignment of human and mouse p11 gene.

1429 (C) Signatures of human and mouse p11 gene. Introns are indicated with grey blocks,  
1430 exons with green blocks, the coding sequence (CDS) of p11 is indicated with magenta  
1431 blocks. Scale bar, 1 kilo base (kb).

1432 (D and E) Alignment of p11 DNA sequences at the locus (D) rs12083193 and (E)  
1433 rs1873311. Asterisks indicate aligned bases with same identity. The identity of aligned  
1434 sequences labeled with the same colored box is indicated as regional sequence  
1435 identity.

1436 **Figure S7. Immunofluorescence staining of (A) primary human hematopoietic**  
1437 **cells and (B) H441 cells infected with *A. fumigatus*** (see also Figure 6).

1438 (A) Hematopoietic cells isolated from human lung tissues were infected with WT or  
1439  $\Delta hscA$  for 3 h. Cells were stained with anti-p11 antibody. See also Figure 6C and 6D.

1440 (B) p11 mRNA was not detected in H441 cells. cDNA of H441 cells or A549 cells were  
1441 PCR amplified using primers of the TBP gene (encoding the TATA-box binding protein)  
1442 as a positive control and primers of the p11 gene. See also Figure 6G.

1443 (C) H441 cells were infected with WT,  $\Delta hscA$ , or *hscA-myc* conidia for 8 h.  
1444 Extracellular conidia and germlings were stained with CFW. Cells were stained with  
1445 anti-p11 and anti-Rab7 antibodies. White arrows indicate p11<sup>+</sup> phagosomes and  
1446 yellow arrows indicate p11<sup>+</sup> phagocytic cups containing conidia. Red arrows indicate  
1447 Rab7<sup>+</sup> phagosomes. Scale bars, 10  $\mu$ m. See also Figures 6I–L.

1448 **Table S1. Human proteins identified using affinity purification mass**  
1449 **spectrometry.** (.xlsx)

1450 **Table S2. Frequency of *p11* (*S100A10*) genotypes among cases of IPA and**  
1451 **controls, and association test results.** (.docx)

1452 **Table S3. Baseline characteristic of transplant recipients enrolled in the study.**  
1453 (.docx)

1454 **Table S4. Key resources used in this study.** (.xlsx)

1455 **Video S1. Exocytosis and phagocytosis of *A. fumigatus* conidium by A549 cells.**

1456 **Video S2. Shuttling of *A. fumigatus* conidium from donor cell to recipient cell.**

1457 **References:**

- 1458 Akoumianaki, T., Kyrmizi, I., Valsecchi, I., Gresnigt, M.S., Samonis, G., Drakos, E., Boumpas, D.,  
1459 Muszkieta, L., Prevost, M.C., Kontoyiannis, D.P., *et al.* (2016). *Aspergillus* cell wall melanin  
1460 blocks LC3-associated phagocytosis to promote pathogenicity. *Cell Host Microbe* *19*, 79–90.  
1461 Amin, S., Thywissen, A., Heinekamp, T., Saluz, H.P., and Brakhage, A.A. (2014). Melanin  
1462 dependent survival of *Aspergillus fumigatus* conidia in lung epithelial cells. *Int J Med Microbiol*  
1463 *304*, 626–636.  
1464 Bain, J.M., Lewis, L.E., Okai, B., Quinn, J., Gow, N.A.R., and Erwig, L.-P. (2012). Non-lytic  
1465 expulsion/exocytosis of *Candida albicans* from macrophages. *Fungal Genet Biol* *49*, 677–678.  
1466 Blango, M.G., Pschibul, A., Riviaccio, F., Krüger, T., Rafiq, M., Jia, L.-J., Zheng, T., Goldmann,  
1467 M., Voltersen, V., Li, J., *et al.* (2020). The dynamic surface proteomes of allergenic fungal  
1468 conidia. *J Proteome Res* *19*, 2092–2104.  
1469 Brakhage, A. (2005). Systemic fungal infections caused by *Aspergillus* species: epidemiology,  
1470 infection process and virulence determinants. *Curr Drug Targets* *6*, 875–886.  
1471 Brakhage, A., and Langfelder, K. (2002). Menacing mold: the molecular biology of *Aspergillus*  
1472 *fumigatus*. *Annu Rev Microbiol* *56*, 433–455.  
1473 Brakhage, A.A., Zimmermann, A.-K., Riviaccio, F., Visser, C., and Blango, M.G. (2021). Host-  
1474 derived extracellular vesicles for antimicrobial defense. *microLife* *2*.  
1475 Bucci, C., Thomsen, P., Nicoziani, P., McCarthy, J., van Deurs, B., and Pfeffer, S.R. (2000). Rab7:  
1476 a key to lysosome biogenesis. *Mol Biol Cell* *11*, 467–480.  
1477 Candela, M., Centanni, M., Fiori, J., Biagi, E., Turrone, S., Orrico, C., Bergmann, S.,  
1478 Hammerschmidt, S., and Brigidi, P. (2010). DnaK from *Bifidobacterium animalis* subsp. *lactis*  
1479 is a surface-exposed human plasminogen receptor upregulated in response to bile salts.  
1480 *Microbiology* *156*, 1609–1618.  
1481 Chen, Y.-D., Fang, Y.-T., Cheng, Y.-L., Lin, C.-F., Hsu, L.-J., Wang, S.-Y., Anderson, R., Chang, C.-  
1482 P., and Lin, Y.-S. (2017). Exophagy of annexin A2 via RAB11, RAB8A and RAB27A in IFN- $\gamma$ -  
1483 stimulated lung epithelial cells. *Sci Rep* *7*, 5676.  
1484 Couger, B., Weirick, T., Damásio, A.R.L., Segato, F., Polizeli, M.D.L.T.D.M., de Almeida, R.S.C.,  
1485 Goldman, G.H., and Prade, R.A. (2018). The genome of a thermo tolerant, pathogenic albino  
1486 *Aspergillus fumigatus*. *Front Microbiol* *9*, 1827.  
1487 Cullen, P.J., and Steinberg, F. (2018). To degrade or not to degrade: mechanisms and  
1488 significance of endocytic recycling. *Nat Rev Mol Cell Biol* *19*, 679–696.  
1489 da Silva Ferreira, M.E., Kress, M.R., Savoldi, M., Goldman, M.H., Härtl, A., Heinekamp, T.,  
1490 Brakhage, A.A., and Goldman, G.H. (2006). The *akuB*(KU80) mutant deficient for

- 1491 nonhomologous end joining is a powerful tool for analyzing pathogenicity in *Aspergillus*  
1492 *fumigatus*. *Eukaryot Cell* 5, 207–211.
- 1493 Dagenais, T.R., and Keller, N.P. (2009). Pathogenesis of *Aspergillus fumigatus* in invasive  
1494 Aspergillosis. *Clin Microbiol Rev* 22, 447–465.
- 1495 De Pauw, B., Walsh, T.J., Donnelly, J.P., Stevens, D.A., Edwards, J.E., Calandra, T., Pappas, P.G.,  
1496 Maertens, J., Lortholary, O., Kauffman, C.A., *et al.* (2008). Revised definitions of invasive  
1497 fungal disease from the European Organization for Research and Treatment of  
1498 Cancer/Invasive Fungal Infections Cooperative Group and the National Institute of Allergy and  
1499 Infectious Diseases Mycoses Study Group (EORTC/MSG) Consensus Group. *Clin Infect Dis* 46,  
1500 1813–1821.
- 1501 DeHart, D.J., Agwu, D.E., Julian, N.C., and Washburn, R.G. (1997). Binding and germination of  
1502 *Aspergillus fumigatus* conidia on cultured A549 pneumocytes. *J Infect Dis* 175, 146–150.
- 1503 Deora, A.B., Kreitzer, G., Jacovina, A.T., and Hajjar, K.A. (2004). An annexin 2 phosphorylation  
1504 switch mediates p11-dependent translocation of annexin 2 to the cell surface. *J Biol Chem*  
1505 279, 43411–43418.
- 1506 Dersch, P., and Isberg, R.R. (1999). A region of the *Yersinia pseudotuberculosis* invasin protein  
1507 enhances integrin-mediated uptake into mammalian cells and promotes self-association.  
1508 *EMBO J* 18, 1199–1213.
- 1509 Döring, K., Ahmed, N., Riemer, T., Suresh, H.G., Vainshtein, Y., Habich, M., Riemer, J., Mayer,  
1510 M.P., O'Brien, E.P., Kramer, G., *et al.* (2017). Profiling Ssb-nascent chain interactions reveals  
1511 principles of Hsp70-assisted folding. *Cell* 170, 298–311.
- 1512 Dziduszko, A., and Ozburn, M.A. (2013). Annexin A2 and S100A10 regulate human  
1513 papillomavirus type 16 entry and intracellular trafficking in human keratinocytes. *J Virol* 87,  
1514 7502–7515.
- 1515 Emans, N., Gorvel, J.P., Walter, C., Gerke, V., Kellner, R., Griffiths, G., and Gruenberg, J. (1993).  
1516 Annexin II is a major component of fusogenic endosomal vesicles. *J Cell Biol* 120, 1357–1369.
- 1517 Erwig, L.P., and Gow, N.A.R. (2016). Interactions of fungal pathogens with phagocytes. *Nat*  
1518 *Rev Microbiol* 14, 163–176.
- 1519 Ewald, J., Riviuccio, F., Radosa, L., Schuster, S., Brakhage, A.A., and Kaleta, C. (2021). Dynamic  
1520 optimization reveals alveolar epithelial cells as key mediators of host defense in invasive  
1521 aspergillosis. *PLoS Comput Biol* 17, e1009645.
- 1522 Fang, Y.-T., Lin, C.-F., Wang, C.-Y., Anderson, R., and Lin, Y.-S. (2012). Interferon- $\gamma$  stimulates  
1523 p11-dependent surface expression of annexin A2 in lung epithelial cells to enhance  
1524 phagocytosis. *J Cell Physiol* 227, 2775–2787.
- 1525 Flannagan, R.S., Jaumouillé, V., and Grinstein, S. (2012). The cell biology of phagocytosis. *Annu*  
1526 *Rev Pathol Mech Dis* 7, 61–98.
- 1527 Gerke, V., and Weber, K. (1984). Identity of p36K phosphorylated upon Rous sarcoma virus  
1528 transformation with a protein purified from brush borders; calcium-dependent binding to  
1529 non-erythroid spectrin and F-actin. *EMBO J* 3, 227–233.



- 1530 Goldmann, M., Schmidt, F., Kyrmizi, I., Chamilos, G., and Brakhage, A.A. (2021). Isolation and  
1531 immunofluorescence staining of *Aspergillus fumigatus* conidia-containing phagolysosomes.  
1532 STAR Protocol 2, 100328.
- 1533 Gray, R.J. (1988). A class of  $K$ -sample tests for comparing the cumulative incidence of a  
1534 competing risk. *Ann Stat* 16, 1141–1154.
- 1535 Gribling-Burrer, A.-S., Chiabudini, M., Zhang, Y., Qiu, Z., Scazzari, M., Wölfle, T., Wohlwend,  
1536 D., and Rospert, S. (2019). A dual role of the ribosome-bound chaperones RAC/Ssb in  
1537 maintaining the fidelity of translation termination. *Nucleic Acids Res* 47, 7018–7034.
- 1538 Guichard, A., Nizet, V., and Bier, E. (2014). RAB11-mediated trafficking in host–pathogen  
1539 interactions. *Nat Rev Microbiol* 12, 624–634.
- 1540 Gumiero, A., Conz, C., Gesé, G.V., Zhang, Y., Weyer, F.A., Lapouge, K., Kappes, J., von Plehwe,  
1541 U., Schermann, G., Fitzke, E., *et al.* (2016). Interaction of the cotranslational Hsp70 Ssb with  
1542 ribosomal proteins and rRNA depends on its lid domain. *Nat Commun* 7, 13563.
- 1543 He, K.L., Deora, A.B., Xiong, H., Ling, Q., Weksler, B.B., Niesvizky, R., and Hajjar, K.A. (2008).  
1544 Endothelial cell annexin A2 regulates polyubiquitination and degradation of its binding  
1545 partner S100A10/p11. *J Biol Chem* 283, 19192–19200.
- 1546 Jahn, B., Langfelder, K., Schneider, U., Schindel, C., and Brakhage, A.A. (2002). PKSP-  
1547 dependent reduction of phagolysosome fusion and intracellular kill of *Aspergillus fumigatus*  
1548 conidia by human monocyte-derived macrophages. *Cell Microbiol* 4, 793–803.
- 1549 Jia, L.-J., Krüger, T., Blango, M.G., von Eggeling, F., Kniemeyer, O., and Brakhage, A.A. (2020).  
1550 Biotinylated surfome profiling identifies potential biomarkers for diagnosis and therapy of  
1551 *Aspergillus fumigatus* infection. *mSphere* 5, e00535-00520.
- 1552 Jin, J., Bhatti, D.L., Lee, K.W., Medrihan, L., Cheng, J., Wei, J., Zhong, P., Yan, Z., Kooiker, C.,  
1553 Song, C., *et al.* (2020). Ahnak scaffolds p11/Anxa2 complex and L-type voltage-gated calcium  
1554 channel and modulates depressive behavior. *Mol Psychiatry* 25, 1035–1049.
- 1555 Jolly, C., Winfree, S., Hansen, B., and Steele-Mortimer, O. (2014). The Annexin A2/p11  
1556 complex is required for efficient invasion of *Salmonella* Typhimurium in epithelial cells. *Cell*  
1557 *Microbiol* 16, 64–77.
- 1558 Keizer, E.M., Wösten, H.A.B., and de Cock, H. (2020). EphA2-dependent internalization of *A.*  
1559 *fumigatus* conidia in A549 lung cells is modulated by DHN-melanin. *Front Microbiol* 11,  
1560 534118.
- 1561 Kinchen, J.M., and Ravichandran, K.S. (2008). Phagosome maturation: going through the acid  
1562 test. *Nature Reviews Molecular Cell Biology* 9, 781-795.
- 1563 Korolchuk, V.I., Saiki, S., Lichtenberg, M., Siddiqi, F.H., Roberts, E.A., Imarisio, S., Jahreiss, L.,  
1564 Sarkar, S., Futter, M., Menzies, F.M., *et al.* (2011). Lysosomal positioning coordinates cellular  
1565 nutrient responses. *Nat Cell Biol* 13, 453–460.
- 1566 Kousha, M., Tadi, R., and Soubani, A.O. (2011). Pulmonary aspergillosis: a clinical review. *Eur*  
1567 *Respir Rev* 20, 156–174.

- 1568 Kyrmizi, I., Ferreira, H., Carvalho, A., Figueroa, J.A.L., Zampas, P., Cunha, C., Akoumianaki, T.,  
1569 Stylianou, K., Deepe, G.S., Jr., Samonis, G., *et al.* (2018). Calcium sequestration by fungal  
1570 melanin inhibits calcium-calmodulin signalling to prevent LC3-associated phagocytosis. *Nat*  
1571 *Microbiol* 3, 791–803.
- 1572 Lapp, K., Vödisch, M., Kroll, K., Strassburger, M., Kniemeyer, O., Heinekamp, T., and Brakhage,  
1573 A.A. (2014). Characterization of the *Aspergillus fumigatus* detoxification systems for reactive  
1574 nitrogen intermediates and their impact on virulence. *Front Microbiol* 5, 469.
- 1575 Latgé, J.P., and Chamilos, G. (2019). *Aspergillus fumigatus* and Aspergillosis in 2019. *Clin*  
1576 *Microbiol Rev* 33, e00140-00118.
- 1577 Ledvina, H.E., Kelly, K.A., Eshraghi, A., Plemel, R.L., Peterson, S.B., Lee, B., Steele, S., Adler, M.,  
1578 Kawula, T.H., Merz, A.J., *et al.* (2018). A phosphatidylinositol 3-kinase effector alters  
1579 phagosomal maturation to promote intracellular growth of *Francisella*. *Cell Host & Microbe*  
1580 24, 285–295.
- 1581 Li, R., Tan, S., Yu, M., Jundt, M.C., Zhang, S., and Wu, M. (2015). Annexin A2 regulates  
1582 autophagy in *Pseudomonas aeruginosa* infection through the Akt1-mTOR-ULK1/2 signaling  
1583 pathway. *J Immunol* 195, 3901–3911.
- 1584 Liu, H., Lee, M.J., Solis, N.V., Phan, Q.T., Swidergall, M., Ralph, B., Ibrahim, A.S., Sheppard, D.C.,  
1585 and Filler, S.G. (2016). *Aspergillus fumigatus* CalA binds to integrin  $\alpha 5\beta 1$  and mediates host  
1586 cell invasion. *Nat Microbiol* 2, 16211.
- 1587 Liu, Z., Wang, Z., Huang, M., Yan, L., Ma, Z., and Yin, Y. (2017). The FgSsb-FgZuo-FgSsz complex  
1588 regulates multiple stress responses and mycotoxin production via folding the soluble SNARE  
1589 Vam7 and beta2-tubulin in *Fusarium graminearum*. *Environ Microbiol* 19, 5040–5059.
- 1590 Lu, H., Xie, Y., Tran, L., Lan, J., Yang, Y., Murugan, N.L., Wang, R., Wang, Y.J., and Semenza, G.L.  
1591 (2020). Chemotherapy-induced S100A10 recruits KDM6A to facilitate OCT4-mediated breast  
1592 cancer stemness. *J Clin Invest* 130, 4607–4623.
- 1593 Luo, Z.-Q., He, S., Li, X., Li, R., Fang, L., Sun, L., Wang, Y., and Wu, M. (2016). Annexin A2  
1594 Modulates ROS and Impacts Inflammatory Response via IL-17 Signaling in Polymicrobial  
1595 Sepsis Mice. *PLOS Pathogens* 12.
- 1596 Ma, H., Croudace, J.E., Lammas, D.A., and May, R.C. (2006). Expulsion of live pathogenic yeast  
1597 by macrophages. *Curr Biol* 16, 2156–2160.
- 1598 Ma, H., Croudace, J.E., Lammas, D.A., and May, R.C. (2007). Direct cell-to-cell spread of a  
1599 pathogenic yeast. *BMC Immunol* 8, 15.
- 1600 Morel, E., and Gruenberg, J. (2007). The p11/S100A10 light chain of annexin A2 is dispensable  
1601 for annexin A2 association to endosomes and functions in endosomal transport. *PLoS One* 2,  
1602 e1118.
- 1603 Morel, E., Parton, R.G., and Gruenberg, J. (2009). Annexin A2-dependent polymerization of  
1604 actin mediates endosome biogenesis. *Dev Cell* 16, 445–457.
- 1605 Pauwels, A.-M., Trost, M., Beyaert, R., and Hoffmann, E. (2017). Patterns, receptors, and  
1606 signals: regulation of phagosome maturation. *Trends Immunol* 38, 407–422.

- 1607 Pazhakh, V., Ellett, F., Croker, B.A., O'Donnell, J.A., Pase, L., Schulze, K.E., Greulich, R.S., Gupta,  
1608 A., Reyes-Aldasoro, C.C., Andrianopoulos, A., *et al.* (2019).  $\beta$ -glucan-dependent shuttling of  
1609 conidia from neutrophils to macrophages occurs during fungal infection establishment. *PLoS*  
1610 *Biol* *17*, e3000113.
- 1611 Perez-Riverol, Y., Bai, J., Bandla, C., García-Seisdedos, D., Hewapathirana, S., Kamatchinathan,  
1612 S., Kundu, D.J., Prakash, A., Frericks-Zipper, A., Eisenacher, M., *et al.* (2022). The PRIDE  
1613 database resources in 2022: a hub for mass spectrometry-based proteomics evidences.  
1614 *Nucleic Acids Res* *50*, D543–D552.
- 1615 Pietrantoni, G., Gaete-Argel, A., Herrera-Rojo, D., Ibarra-Karmy, R., Bustos, F.J., Valiente-  
1616 Echeverría, F., Arriagada, G., and Silvestri, G. (2021). Dynein light-chain Dynlrb2 is essential  
1617 for murine leukemia virus traffic and nuclear entry. *J Virol* *95*, e00170-00121.
- 1618 Puisieux, A., Ji, J., and Ozturk, M. (1996). Annexin II up-regulates cellular levels of p11 protein  
1619 by a post-translational mechanisms. *Biochem J* *313*, 51–55.
- 1620 Rakwalska, M., and Rospert, S. (2004). The ribosome-bound chaperones RAC and Ssb1/2p are  
1621 required for accurate translation in *Saccharomyces cerevisiae*. *Mol Cell Biol* *24*, 9186–9197.
- 1622 Reddy, T.R.K., Li, C., Fischer, P.M., and Dekker, L.V. (2012). Three-dimensional pharmacophore  
1623 design and biochemical screening identifies substituted 1,2,4-triazoles as inhibitors of the  
1624 Annexin A2-S100A10 protein interaction. *ChemMedChem* *7*, 1435–1446.
- 1625 Rink, J., Ghigo, E., Kalaidzidis, Y., and Zerial, M. (2005). Rab conversion as a mechanism of  
1626 progression from early to late endosomes. *Cell* *122*, 735–749.
- 1627 Schmidt, F., Thywißen, A., Goldmann, M., Cunha, C., Cseresnyés, Z., Schmidt, H., Rafiq, M.,  
1628 Galiani, S., Gräler, M.H., Chamilos, G., *et al.* (2020). Flotillin-dependent membrane  
1629 microdomains are required for functional phagolysosomes against fungal infections. *Cell Rep*  
1630 *32*, 108017.
- 1631 Scrucca, L., Santucci, A., and Aversa, F. (2007). Competing risk analysis using R: an easy guide  
1632 for clinicians. *Bone Marrow Transplant* *40*, 381–387.
- 1633 Scrucca, L., Santucci, A., and Aversa, F. (2010). Regression modeling of competing risk using  
1634 R: an in depth guide for clinicians. *Bone Marrow Transplant* *45*, 1388–1395.
- 1635 Seidel, C., Moreno-Velásquez, S.D., Ben-Ghazzi, N., Gago, S., Read, N.D., and Bowyer, P. (2020).  
1636 Phagolysosomal survival enables non-lytic hyphal escape and ramification through lung  
1637 epithelium during *Aspergillus fumigatus* infection. *Front Microbiol* *11*.
- 1638 Serra, N.D., and Sundaram, M.V. (2021). Transcytosis in the development and morphogenesis  
1639 of epithelial tissues. *The EMBO Journal* *40*.
- 1640 Shah, A., Kannambath, S., Herbst, S., Rogers, A., Soresi, S., Carby, M., Reed, A., Mostowy, S.,  
1641 Fisher, M.C., Shaunak, S., *et al.* (2016). Calcineurin orchestrates lateral transfer of *Aspergillus*  
1642 *fumigatus* during macrophage cell death. *Am J Respir Crit Care Med* *194*, 1127–1139.
- 1643 Shemesh, E., Hanf, B., Hagag, S., Attias, S., Shadkchan, Y., Fichtman, B., Harel, A., Krüger, T.,  
1644 Brakhage, A.A., Kniemeyer, O., *et al.* (2017). Phenotypic and Proteomic Analysis of the

- 1645 *Aspergillus fumigatus*  $\Delta$ PrT,  $\Delta$ XprG and  $\Delta$ XprG/ $\Delta$ PrT Protease-Deficient Mutants. *Frontiers*  
1646 *in Microbiology* 8.
- 1647 Stukes, S., Coelho, C., Rivera, J., Jedlicka, A.E., Hajjar, K.A., and Casadevall, A. (2016). The  
1648 membrane phospholipid binding protein Annexin A2 promotes phagocytosis and nonlytic  
1649 exocytosis of *Cryptococcus neoformans* and impacts survival in fungal infection. *J Immunol*  
1650 197, 1252–1261.
- 1651 Sun, J.N., Solis, N.V., Phan, Q.T., Bajwa, J.S., Kashleva, H., Thompson, A., Liu, Y., Dongari-  
1652 Bagtzoglou, A., Edgerton, M., and Filler, S.G. (2010). Host cell invasion and virulence mediated  
1653 by *Candida albicans* Ssa1. *PLoS Pathog* 6, e1001181.
- 1654 Svenningsson, P., and Greengard, P. (2007). p11 (S100A10) — an inducible adaptor protein  
1655 that modulates neuronal functions. *Curr Opin Pharmacol* 7, 27–32.
- 1656 Taccone, F.S., Van den Abeele, A.-M., Bulpa, P., Misset, B., Meersseman, W., Cardoso, T., Paiva,  
1657 J.-A., Blasco-Navalpotro, M., De Laere, E., Dimopoulos, G., *et al.* (2015). Epidemiology of  
1658 invasive aspergillosis in critically ill patients: clinical presentation, underlying conditions, and  
1659 outcomes. *Crit Care* 19, 7.
- 1660 Taylor, J.R., Fernandez, D.J., Thornton, S.M., Skeate, J.G., Luhen, K.P., Da Silva, D.M., Langen,  
1661 R., and Kast, W.M. (2018a). Heterotetrameric annexin A2/S100A10 (A2t) is essential for  
1662 oncogenic human papillomavirus trafficking and capsid disassembly, and protects virions  
1663 from lysosomal degradation. *Sci Rep* 8, 11642.
- 1664 Taylor, J.R., Skeate, J.G., and Kast, W.M. (2018b). Annexin A2 in virus infection. *Front*  
1665 *Microbiol* 9, 2954.
- 1666 Thapa, N., Chen, M., Horn, H.T., Choi, S., Wen, T., and Anderson, R.A. (2020).  
1667 Phosphatidylinositol 3-kinase signalling is spatially organized at endosomal compartments by  
1668 microtubule-associated protein 4. *Nat Cell Biol* 22, 1357–1370.
- 1669 Thywissen, A., Heinekamp, T., Dahse, H.-M., Schmalzer-Ripcke, J., Nietzsche, S., Zipfel, P.F., and  
1670 Brakhage, A.A. (2011). Conidial dihydroxynaphthalene melanin of the human pathogenic  
1671 fungus *Aspergillus fumigatus* interferes with the host endocytosis pathway. *Front Microbiol*  
1672 2, 96.
- 1673 Valiante, V., Baldin, C., Hortschansky, P., Jain, R., Thywissen, A., Strassburger, M., Shelest, E.,  
1674 Heinekamp, T., and Brakhage, A.A. (2016). The *Aspergillus fumigatus* conidial melanin  
1675 production is regulated by the bifunctional bHLH DevR and MADS-box RlmA transcription  
1676 factors. *Mol Microbiol* 102, 321–335.
- 1677 van Niel, G., D'Angelo, G., and Raposo, G. (2018). Shedding light on the cell biology of  
1678 extracellular vesicles. *Nat Rev Mol Cell Biol* 19, 213–228.
- 1679 Vieira, O.V., Bucci, C., Harrison, R.E., Trimble, W.S., Lanzetti, L., Gruenberg, J., Schreiber, A.D.,  
1680 Stahl, P.D., and Grinstein, S. (2003). Modulation of Rab5 and Rab7 recruitment to phagosomes  
1681 by phosphatidylinositol 3-kinase. *Mol Cell Biol* 23, 2501–2514.
- 1682 Voltersen, V., Blango, M.G., Herrmann, S., Schmidt, F., Heinekamp, T., Strassburger, M.,  
1683 Krüger, T., Bacher, P., Lothar, J., Weiss, E., *et al.* (2018). Proteome analysis reveals the conidial

- 1684 surface protein CcpA essential for virulence of the pathogenic fungus *Aspergillus fumigatus*.  
1685 MBio 9, e01557-01518.
- 1686 Walpole, G.F.W., Plumb, J.D., Chung, D., Tang, B., Boulay, B., Osborne, D.G., Piotrowski, J.T.,  
1687 Catz, S.D., Billadeau, D.D., Grinstein, S., *et al.* (2020). Inactivation of Rho GTPases by  
1688 *Burkholderia cenocepacia* induces a WASH-mediated actin polymerization that delays  
1689 phagosome maturation. Cell Rep 31.
- 1690 Wasylnka, J.A., and Moore, M.M. (2002). Uptake of *Aspergillus fumigatus* conidia by  
1691 phagocytic and nonphagocytic cells in vitro: quantitation using strains expressing green  
1692 fluorescent protein. Infect Immun 70, 3156–3163.
- 1693 Wasylnka, J.A., and Moore, M.M. (2003). *Aspergillus fumigatus* conidia survive and germinate  
1694 in acidic organelles of A549 epithelial cells. J Cell Sci 116, 1579–1587.
- 1695 Wei, D., Zhan, W., Gao, Y., Huang, L., Gong, R., Wang, W., Zhang, R., Wu, Y., Gao, S., and Kang,  
1696 T. (2020). RAB31 marks and controls an ESCRT-independent exosome pathway. Cell Res 31,  
1697 157–177.
- 1698 Welz, T., Wellbourne-Wood, J., and Kerkhoff, E. (2014). Orchestration of cell surface proteins  
1699 by Rab11. Trends Cell Biol 24, 407–415.
- 1700 Westman, J., Walpole, G.F.W., Kasper, L., Xue, B.Y., Elshafee, O., Hube, B., and Grinstein, S.  
1701 (2020). Lysosome fusion maintains phagosome integrity during fungal infection. Cell Host  
1702 Microbe 28, 798–812.
- 1703 Willmund, F., del Alamo, M., Pechmann, S., Chen, T., Albanese, V., Dammer, E.B., Peng, J., and  
1704 Frydman, J. (2013). The cotranslational function of ribosome-associated Hsp70 in eukaryotic  
1705 protein homeostasis. Cell 152, 196–209.
- 1706 Woodham, A.W., Taylor, J.R., Jimenez, A.I., Skeate, J.G., Schmidt, T., Brand, H.E., Da Silva, D.M.,  
1707 and Kast, W.M. (2015). Small molecule inhibitors of the annexin A2 heterotetramer prevent  
1708 human papillomavirus type 16 infection. J Antimicrobi Chemother, 1686–1690.
- 1709 Xie, J., Zhang, P., Crite, M., Lindsay, C.V., and DiMaio, D. (2021). Retromer stabilizes transient  
1710 membrane insertion of L2 capsid protein during retrograde entry of human papillomavirus.  
1711 Sci Adv 7, eabh4276.
- 1712 Yang, J., Liu, M., Liu, X., Yin, Z., Sun, Y., Zhang, H., Zheng, X., Wang, P., and Zhang, Z. (2018).  
1713 Heat-shock proteins MoSsb1, MoSsz1, and MoZuo1 attenuate MoMkk1-mediated cell-wall  
1714 integrity signaling and are important for growth and pathogenicity of *Magnaporthe oryzae*.  
1715 Mol Plant Microbe Interact 31, 1211–1221.
- 1716 Yarwood, R., Hellicar, J., Woodman, P.G., and Lowe, M. (2020). Membrane trafficking in health  
1717 and disease. Dis Model Mech 13, dmm043448.
- 1718 Young, J.M., Zine El Abidine, A., Gómez-Martinez, R.A., and Ozbun, M.A. (2019). The known  
1719 and potential intersections of Rab-GTPases in human papillomavirus infections. Front Cell Dev  
1720 Biol 7, 139.
- 1721 Zhang, X.-M., Ellis, S., Sriratana, A., Mitchell, C.A., and Rowe, T. (2004). Sec15 is an effector  
1722 for the Rab11 GTPase in mammalian cells. J Biol Chem 279, 43027–43034.

1723 Zobiack, N., Rescher, U., Ludwig, C., Zeuschner, D., and Gerke, V. (2003). The Annexin  
1724 2/S100A10 complex controls the distribution of transferrin receptor-containing recycling  
1725 endosomes. *Mol Biol Cell* *14*, 4896–4908.  
1726

**Fig. 1**

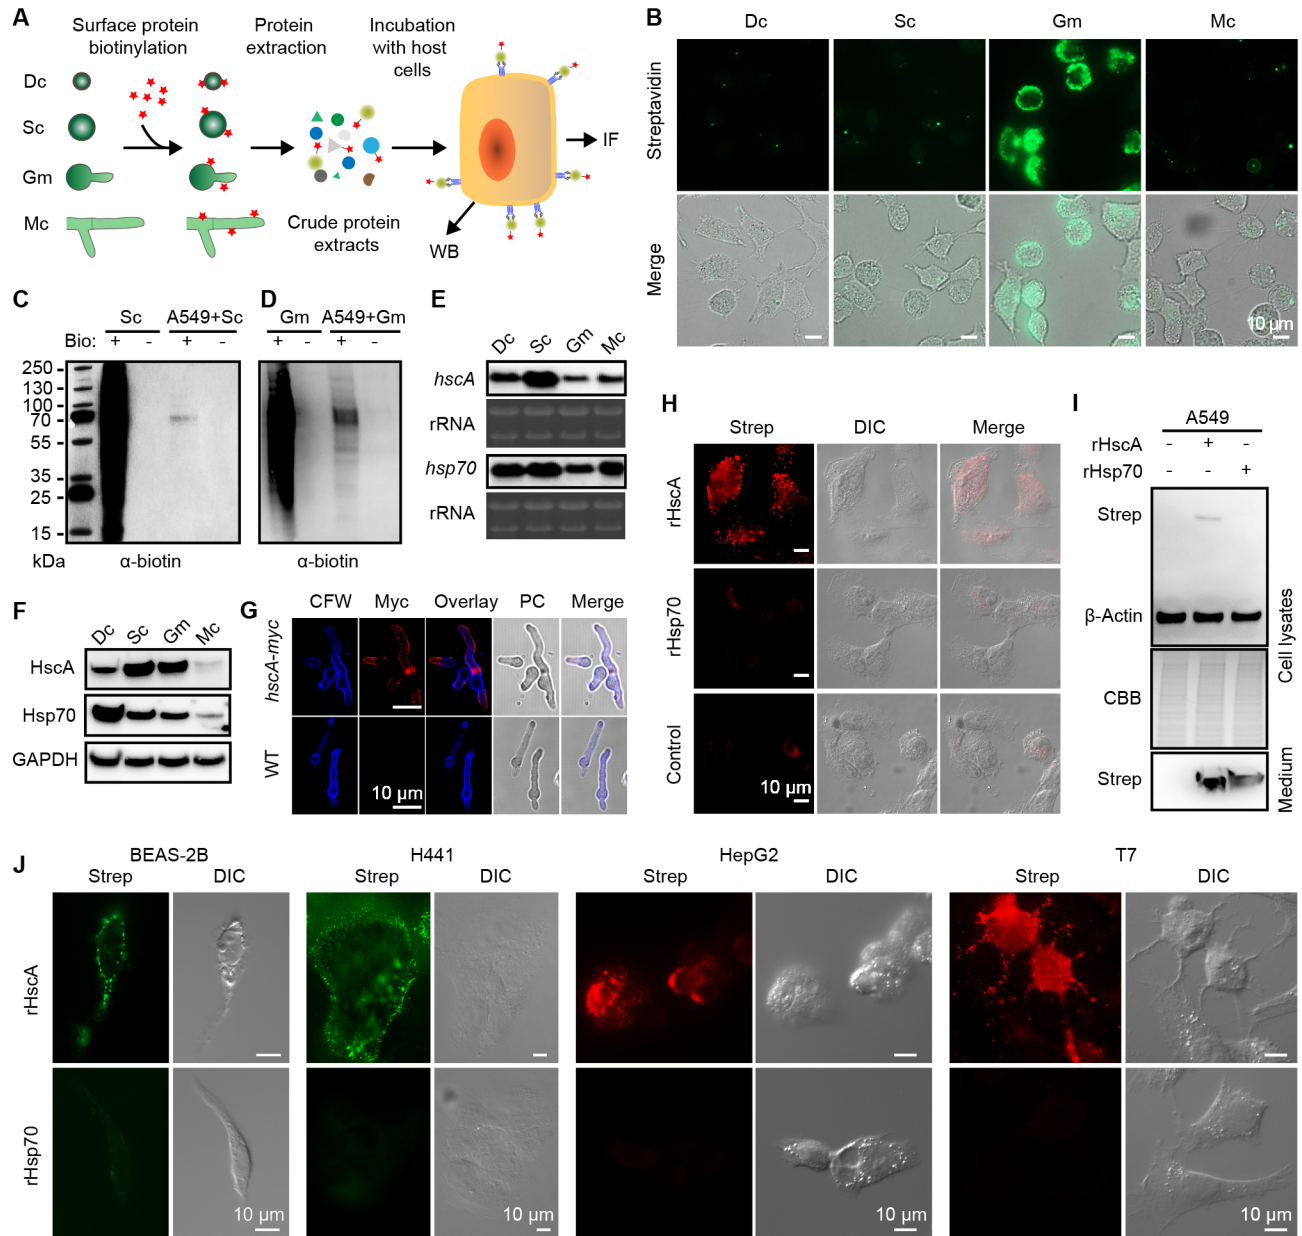

**Fig. 2**

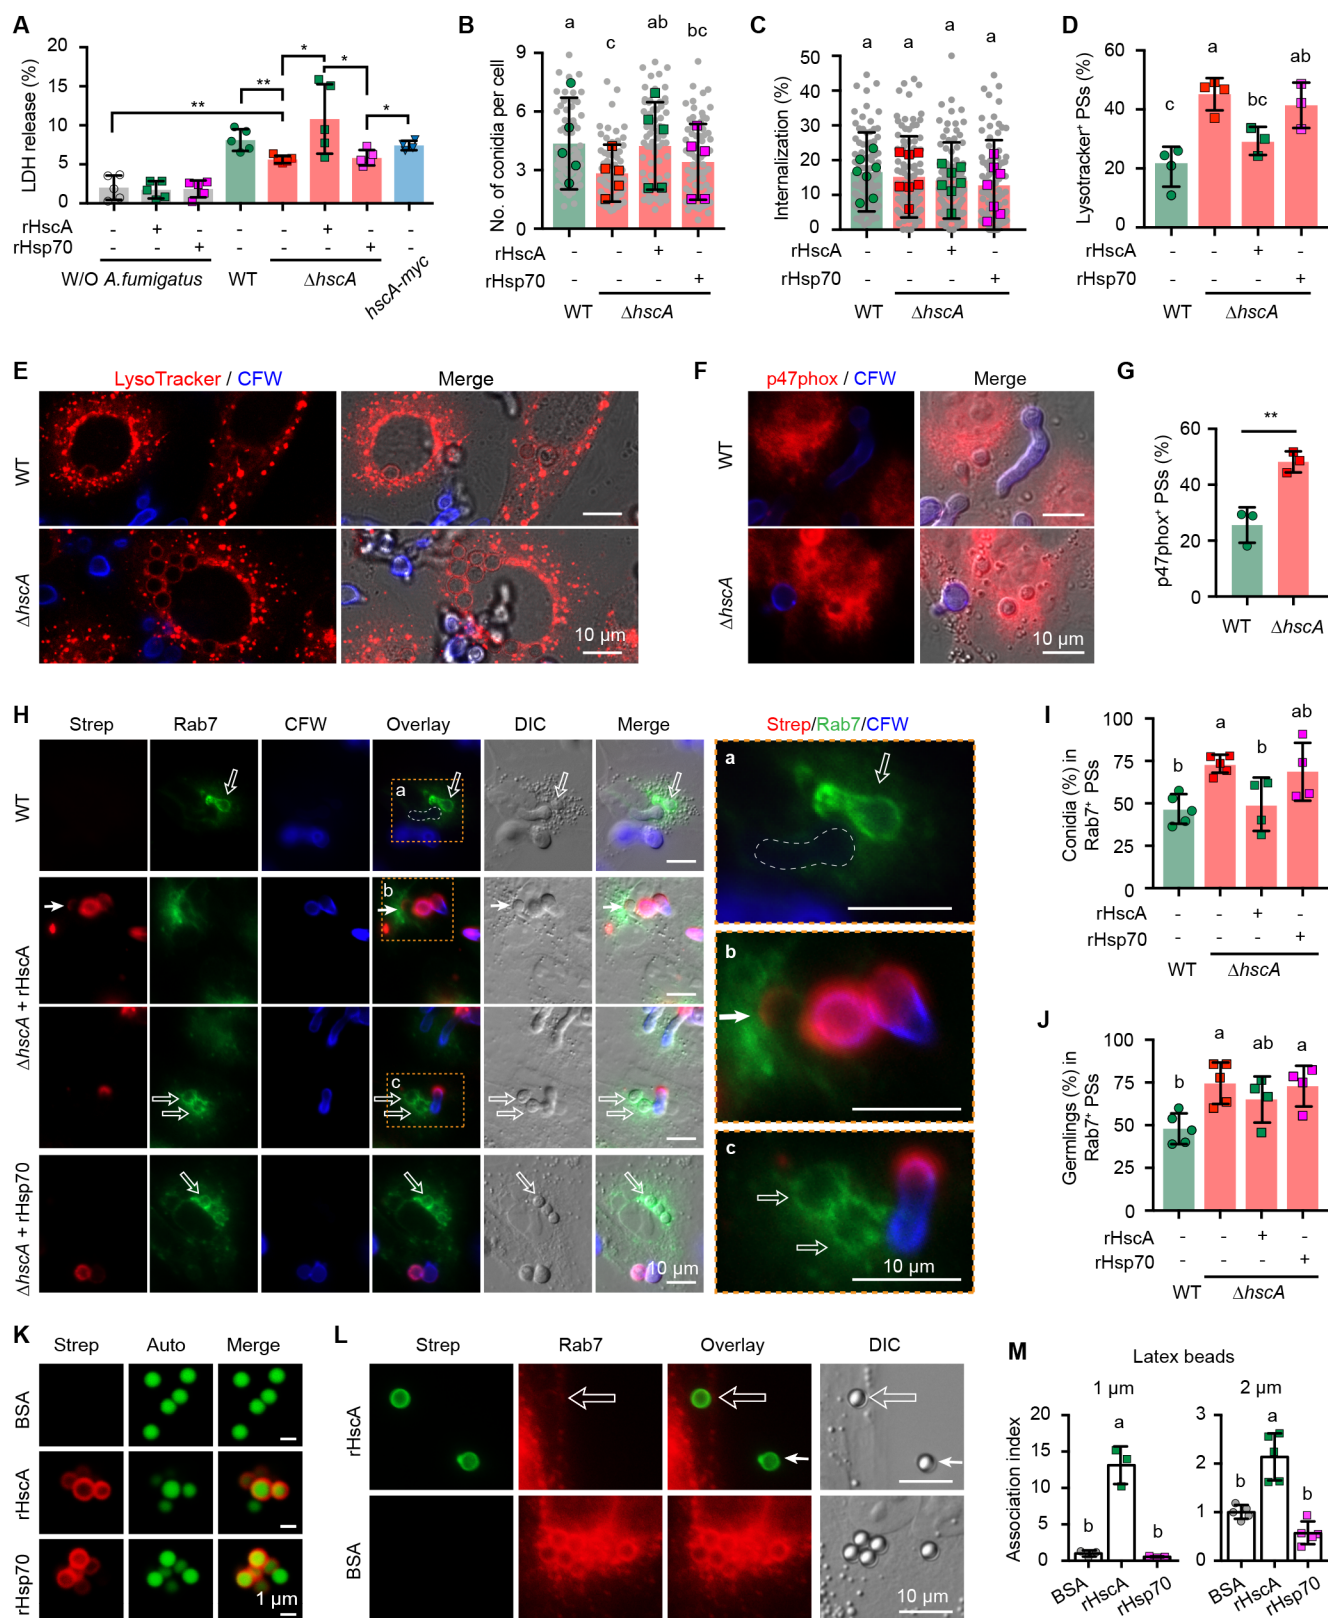



**Fig. 3**

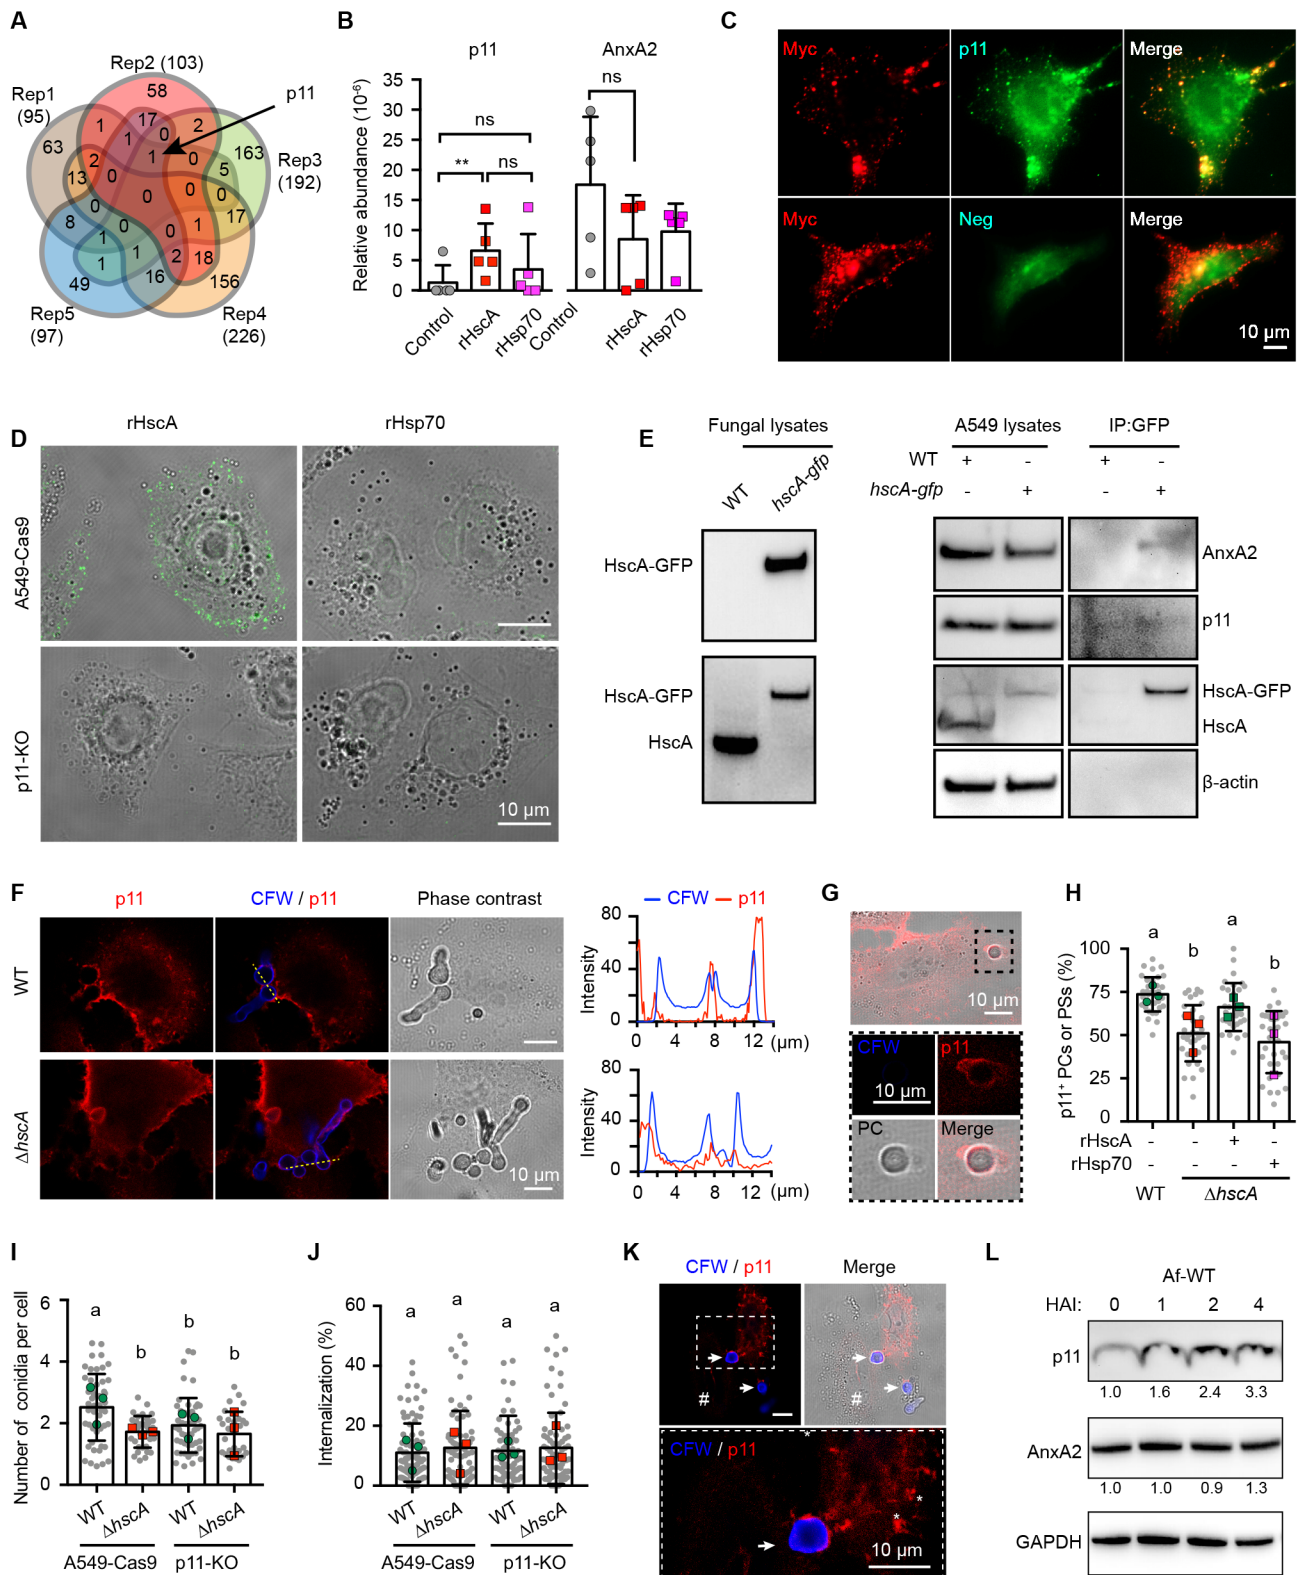

**Fig. 4**

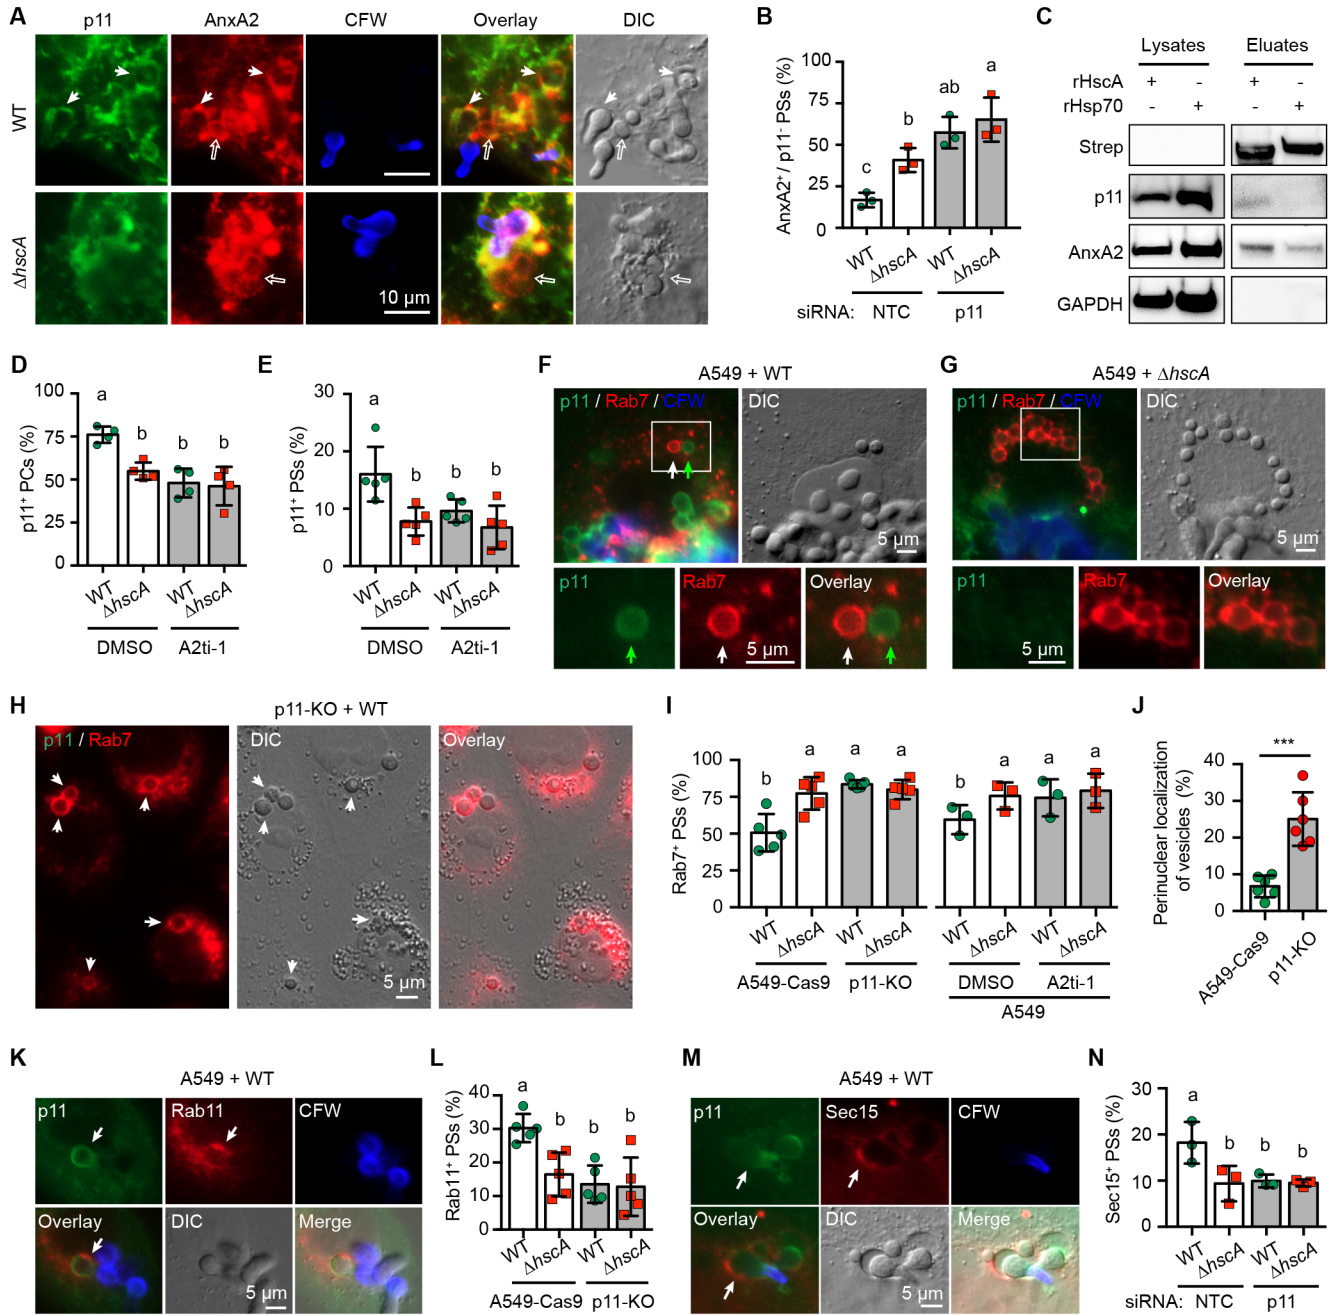

**Fig. 5**

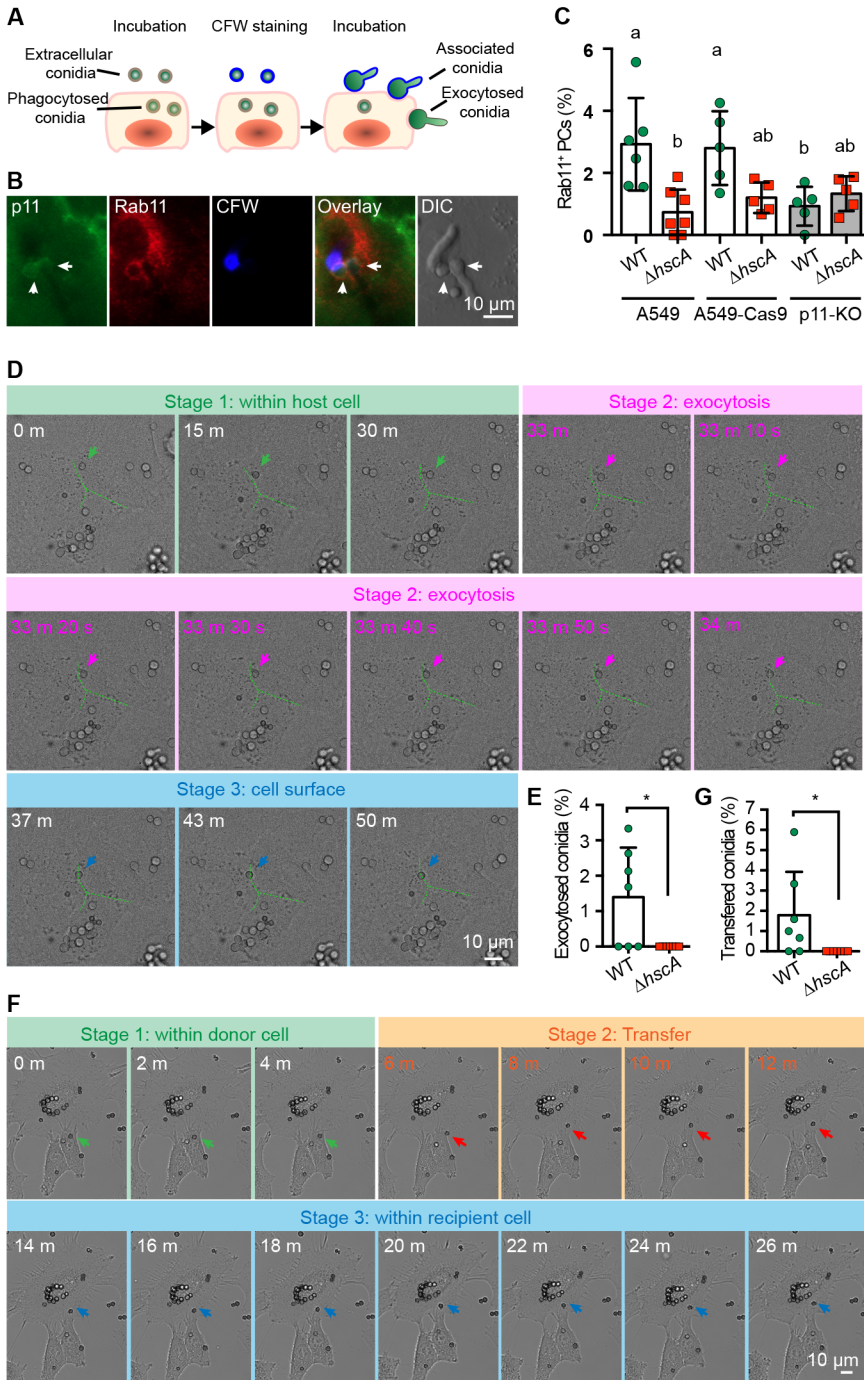

**Fig. 6**

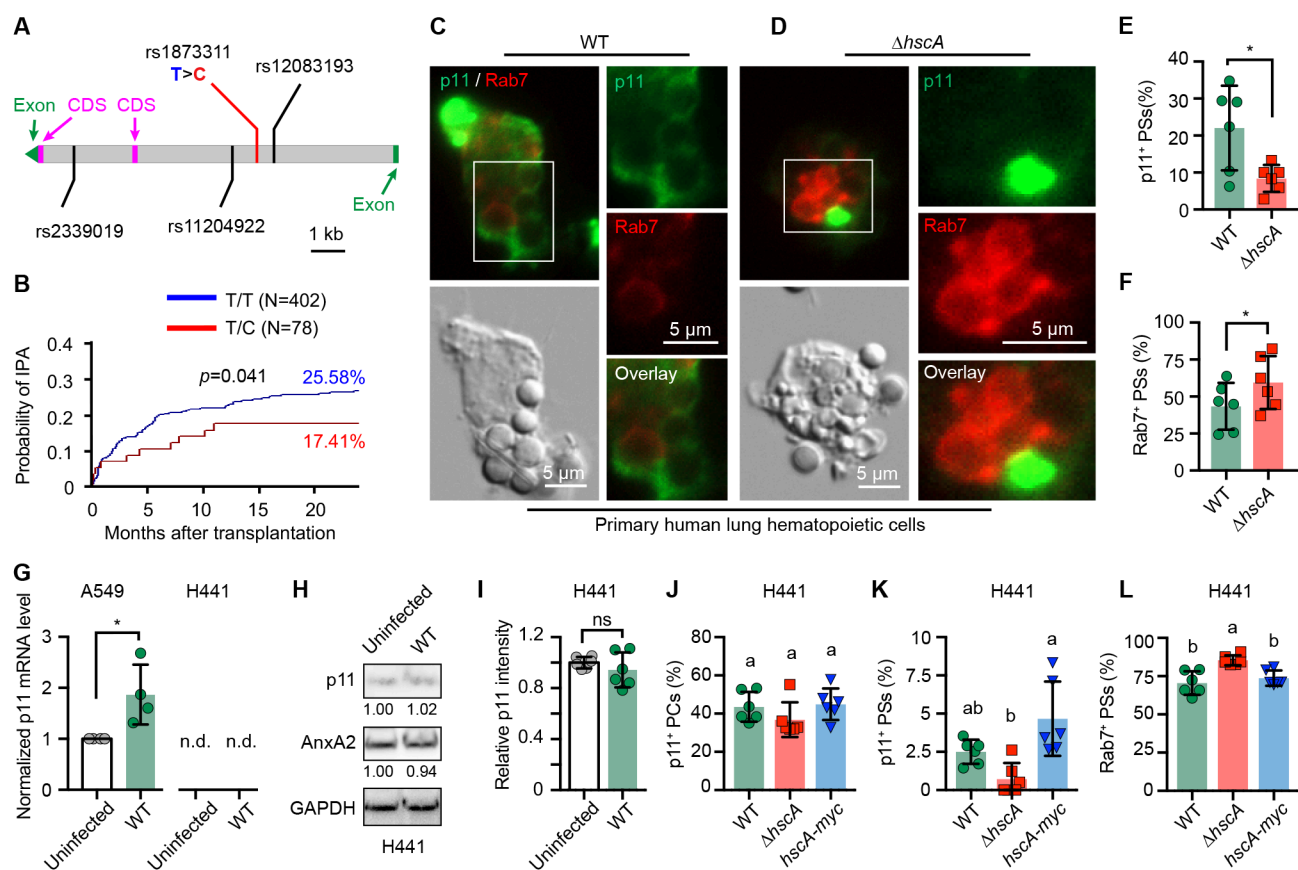

**Fig. 7**

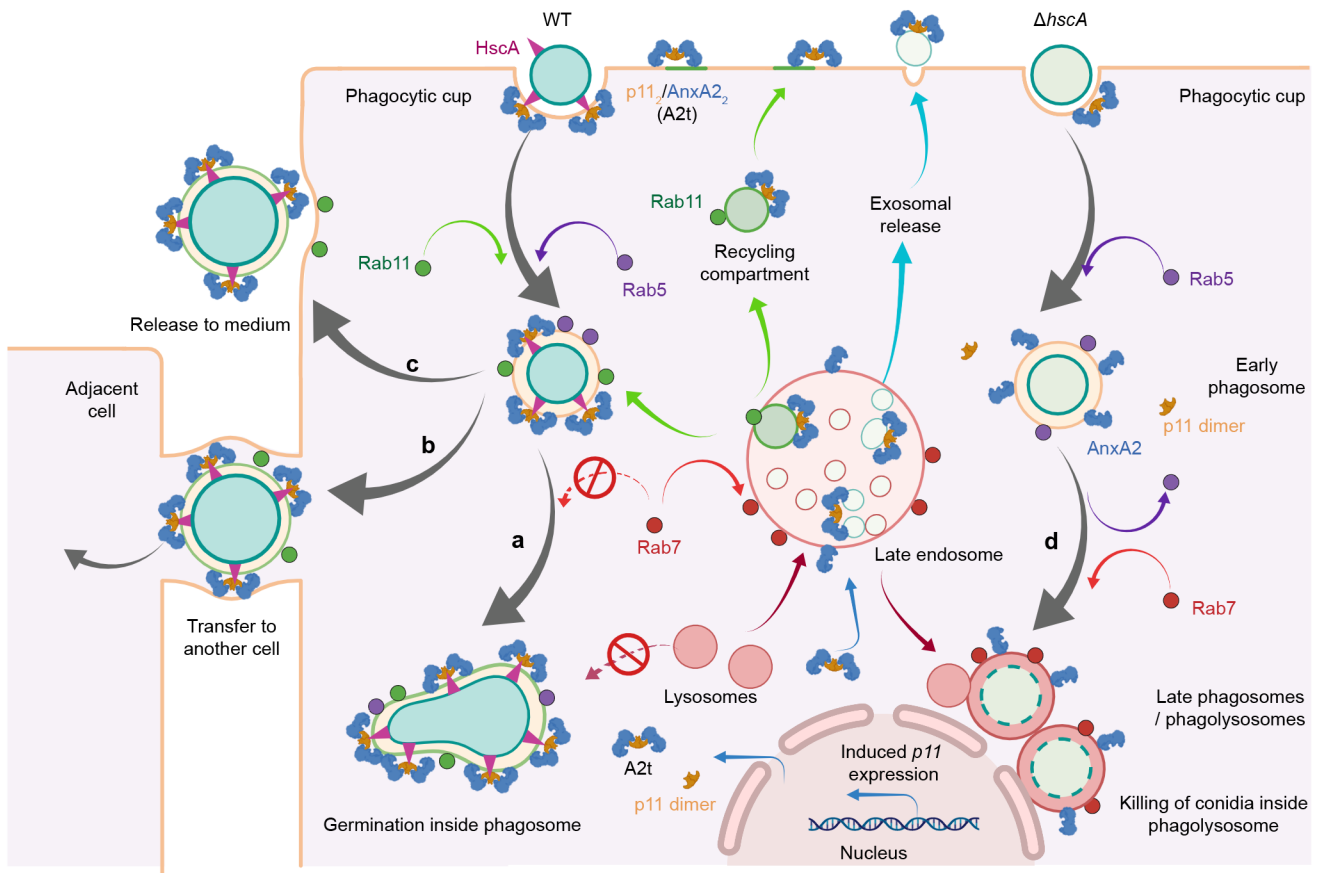

Source: https://www.biorxiv.org/content/10.1101/2022.05.18.492126v1.full.pdf
